RESEARCH ARTICLE

# *In vivo* anti-ulceration effect of *Pancratium maritimum* extract against ethanol-induced rats via NLRP3 inflammasome and HMGB1/TLR4/MYD88/NF- $\kappa$ B signaling pathways and its extract metabolite profile

Rehab F. Taher<sup>1</sup>✉, Eman M. Abd El ghany<sup>2</sup>✉, Zeinab A. El-Gendy<sup>3</sup>✉, Mai M. Elghonemy<sup>1</sup>, Heba A. Hassan<sup>4</sup>, Gehad A. Abdel Jaleel<sup>3</sup>, Azza Hassan<sup>5</sup>, Tushar C. Sarker<sup>6</sup>, Ahmed M. Abd-ElGawad<sup>7</sup>✉, Mohamed A. Farag<sup>2,8</sup>✉, Abdelsamed I. Elshamy<sup>1</sup>✉

**1** Department of Natural Compounds Chemistry, National Research Centre, Dokki, Giza, Egypt, **2** Pharmacognosy Department, Faculty of Pharmacy, Cairo University, Cairo, Egypt, **3** Department of Pharmacology, Medical Research and Clinical Studies Institute, National Research Centre, Dokki, Giza, Egypt, **4** Therapeutic Chemistry Department, National Research Centre, Dokki, Giza, Egypt, **5** Department of Pathology, Faculty of Veterinary Medicine, Cairo University, Cairo, Egypt, **6** Texas A&M AgriLife Research Center, Overton, Texas, United States of America, **7** Plant Production Department, College of Food & Agriculture Sciences, King Saud University, Riyadh, Saudi Arabia, **8** Healthcare Department, Saxony Egypt University (SEU), Badr City, Egypt

✉ These authors contributed equally to this work.

\* [mohamed.farag@pharma.cu.edu.eg](mailto:mohamed.farag@pharma.cu.edu.eg) (MAF); [aibrahim2@ksu.edu.sa](mailto:aibrahim2@ksu.edu.sa) (AMA-E); [elshamynrc@yahoo.com](mailto:elshamynrc@yahoo.com) (A.I.E.)

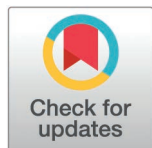

## OPEN ACCESS

**Citation:** Taher RF, Abd El ghany EM, El-Gendy ZA, Elghonemy MM, Hassan HA, Abdel Jaleel GA, et al. (2025) *In vivo* anti-ulceration effect of *Pancratium maritimum* extract against ethanol-induced rats via NLRP3 inflammasome and HMGB1/TLR4/MYD88/NF- $\kappa$ B signaling pathways and its extract metabolite profile. PLoS ONE 20(4): e0321018. <https://doi.org/10.1371/journal.pone.0321018>

**Editor:** Akingbolabo Daniel Ogunlakin, Bowen University, Nigeria

**Received:** July 17, 2024

**Accepted:** February 27, 2025

**Published:** April 16, 2025

**Copyright:** © 2025 Taher et al. This is an open access article distributed under the terms of the [Creative Commons Attribution License](https://creativecommons.org/licenses/by/4.0/), which permits unrestricted use, distribution, and reproduction in any medium, provided the original author and source are credited.

**Data availability statement:** All relevant data are within the paper and its Supporting Information files.

**Funding:** This research was supported by The Researchers Supporting Project number

## Abstract

### Background

Gastric ulcer is a multifaceted ailment of multiple causes and is chronic warranting the discovery of remedies to alleviate its symptoms and severity. *Pancratium maritimum* L. is recognized for its several health benefits, although its potential against gastric ulcers has yet to be reported.

### Methods and findings

This study reports on the effects of *P. maritimum* L. whole plant (PM-EtOH) ethanol extract at a dose of 25, 50, and 100 mg/kg body weight orally for managing ethanol-induced peptic ulcer in rats. The anti-ulceration capacity of PM-EtOH was determined against ethanol (EtOH)-induced rats *via* biochemical, histological, immunohistochemical, and western blotting assays. The profiling of the bioactive metabolites in *P. maritimum* extract was based on Ultra-high-performance liquid chromatography coupled with electrospray ionization quadrupole time-of-flight mass spectrometry (UHPLC-ESI-qTOF-MS/MS) analysis. Following PM-EtOH treated group, the gastric glutathione (GSH) level dropped in the ulcer group receiving ethanol was restored to normal levels. Additionally, following PM-EtOH, elevated malondialdehyde (MDA) content in the stomach tissues diminished. PM-EtOH treated group displayed recovery and comparable morphology compared with normal group,

(RSPD2025R676) King Saud University,  
Riyadh, Saudi Arabia

**Competing interests:** The authors declare that they have no conflict of interest.

concurrent with lower levels of Tumor Necrosis Factor  $\alpha$  (TNF- $\alpha$ ), MyD88, and NLRP3, along with low expression of Nuclear Factor kappa  $\beta$  (NF- $\kappa\beta$ ) and high-mobility group box protein 1 (HMGB1) proteins. Immune-histochemicals of caspase-3 and toll-like receptors-4 (TLR-4) showed their normalization. These findings imply that PM-EtOH exerts a protective effect on rat stomach damage that has yet to be further tested in clinical trials for treatment of stomach ulcers. Phytochemical profiling of PM-EtOH via UHPLC-ESI-qTOF-MS/MS led to the identification of 84 metabolites belonging to amino acids, organic acids, phenolic acids, alkaloids, flavonoids, and fatty acids to likely mediate for the observed effects.

## Conclusions

These outcomes provided evidence for the potential of PM-EtOH in gastric ulcers management.

## 1. Introduction

Gastric ulcer is a long-term disorder that develops damage to the gastric mucosa [1]. Disparity between protective elements as mucus and bicarbonate production, epithelial cell barrier integrity, and sufficient blood flow and aggressive variables like high stomach acid production, pepsin activity, the presence of *Helicobacter pylori*, or exogenous substances such as ethanol, “all factors affecting the luminal surface of epithelial cells, as well as subsequent injury in the gastro-duodenal mucosa caused by immunologic or environmental factors, are aspects that engender peptic ulcer [2]. Exacerbating variables comprise *Helicobacter pylori*, HCl, pepsin, non-steroidal anti-inflammatory medicine (NSAIDs), bile acids, ischemia, hypoxia, smoking, and alcohol [3]. Contrarily, the protective factors include growth factors, glutathione (GSH), bicarbonate, nitric oxide (NO), prostaglandins (PGs), as well as enzymes acting as antioxidants or peptides [4].

The term “peptic ulcer” refers to epithelial sores that penetrate muscularis mucosae layer, creating a hollow encircled by both acute and chronic inflammation [5]. Accessible pharmacological regimes that are available to promote mucosal damage healing and prevent peptic ulcers include PG analogs, proton pump inhibitors, histamine H2 receptor antagonists (H2RAs), antibiotics, and cytoprotective medications [6]. Nevertheless, all current regimens have side effects i.e., gastric disturbance comprising vomiting, nausea, diarrhea, constipation, and cardiovascular effects [7]. Other side effects include impotence, hypoacidity, gynecomastia, osteoporotic bone fractures, and hypergastrinemia [6]. Hence, there is a need to identify medications that are less risky, and affordable [8].

Inflammation is caused by exposure to various stimuli, such as ROS, which oxidize cellular proteins and lipids, leading to the disruption of the intestinal tract barrier and increasing gut permeability [9]. Nuclear protein HMGB1 is a chromatin-binding factor that regulates the transcription of many nuclear genes and stabilizes nucleosomes [10]. Extracellular HMGB1, on the other hand, is a strong cytokine that is proinflammatory and released by monocytes and macrophages or leaks during cell necrosis. HMGB1 binds to many receptors, including Toll-like receptor 4 (TLR-4) [11]. After attaching itself to its receptors, HMGB1 causes inflammation via cell differentiation as TLR-4 produces MyD88, a component of the NF- $\kappa\beta$  pathway, in response to ligand recognition [12]. Inhibitor of kappa B (I $\kappa$ B) protein in the cytoplasm releases Nuclear factor kappa-light-chain-enhancer of activated B cells/p65 subunit (NF- $\kappa\beta$ /p65), which then translocate to the nucleus as it activates the transcription

of additional pro-inflammatory cytokines including TNF- $\alpha$  [13] and Leucine-rich repeat-containing protein 3 (NLRP3) [14]. NLRP3 processes TNF- $\alpha$  precursor, facilitating its development. TNF- $\alpha$  inhibits stomach microcirculation delaying ulcerated mucosal healing [15]. Therefore, inhibition of the activation of NLRP3 inflammasome and HMGB1/TLR4/MYD88/NF- $\kappa$ B signaling pathway can be a therapeutic target for the treatment of inflammation.

Contemporary herbal medicine is increasingly emerging as a potential source of drug discovery [16]. *Pancratium maritimum* L. or (sea daffodil), Amaryllidaceae Family, is a perennial Mediterranean plant that is typical of sandy coastal environments [17, 18]. Previous papers have revealed its richness in chemical classes including alkaloids, flavonoids [19], phenolic acids [19, 20], chromones, acetophenones [19], phenylpropanoids [21], and alginates [22]. Taking into account its intriguing medical value, the plant was reported to exhibit several health-promoting activities, such as purgative, acaricidal, insecticidal, and antifungal activities for the leaf and bulb extracts [17]. The whole plant was utilized in folk medicine as an emetic, hypotensive, and for treatment of spleen inflammation [19]. Furthermore, the anticancer [21,23], antimicrobial, antiviral [24], radical scavenging [23], antinociceptive [25], amoebicidal [26], antimalarial [27], and acetylcholinesterase inhibiting [28] activities of extracts from several *P. maritimum* accessions in addition to identified compounds have been reported.

For the first time in the literature, the current investigation targeted to: (i) examine PM-EtOH's anti-ulcerogenic ability against ethanol-induced ulceration in rate model; (ii) carry out a comprehensive metabolites profile analysis of PM-EtOH employing UHPLC-ESI-Orbitrap-MSUHPLC-ESI-Orbital Trap-MS; and (iii) study the mechanism of action linked to the metabolites profile through biochemical and histopathological assays.

## 2. Materials and methods

### 2.1. Plant collection and authentication

Throughout the flowering season at the end of April 2022, the entire plant of *Pancratium maritimum* was collected from the Egyptian eastern desert in Wadi Hagul (30°02'34.3" N, 32°05'40.6" E). Prof. Dr. Ahmed M. Abdel Gawad, a plant ecology professor authenticated the plant specimen. A voucher specimen (896-PM-2-ByH/22-00562) is deposited at the Herbarium of the Faculty of Science, Mansoura University in Egypt.

### 2.2. Preparation of the extract

The collected plant material was thoroughly cleaned to remove dirt or sand and placed into an open, shaded room that was perfectly dried at room temperature. Following drying, it was ground up into a powder with a sanitized plant grinder. The plant powder (700 g) was extracted for three days by maceration in 70% EtOH (3 L) at 25–28 °C. After filtration, the collected extract was thoroughly dried under low pressure to yield 28.7 g of sticky dark black residue. Dried extract that is devoid of EtOH was stored at 4 °C till further biological or chemical analysis.

### 2.3. Acute toxicity test

All biological studies were conducted in accordance with the Ethical Committee of the Medical Research Ethics Committee and Animal Care and Use Committee (ACUC), and National Research Center (approval number; 513012023). Six Wistar rats, males, were utilized to assess oral acute toxicity of PM-EtOH under investigation following the procedure with the starting dose of 2000 mg/kg b.w. of the extract mentioned in OCED guidelines. Six overnight fasted rats

were administered 2000 mg/kg b.w. of PM-EtOH orally for seven days. The toxicity, behavioral alteration, any clinical signs of toxicity, and mortality were observed (OECD, 2000).

## 2.4. Gastroprotection assay

**2.4.1. Chemicals and drugs.** Acetonitrile, formic acid ( $\geq 95.0\%$ , FA), water, and methanol (LC-MS grade) were purchased from Merck (Darmstadt, Germany). Ethanol (96%) was also purchased from Merck Millipore [Burlington, Massachusetts, USA](#). Omeprazole was acquired from Sigma-Aldrich.

**2.4.2. Animals.** A total of 36 male mature Wistar albino rats, each weighing between 200 and 250 grams, were obtained from the animal house at the National Research Centre. Every animal was housed in metal cages with adequate ventilation, maintained at 22 °C with 12-h cycles of light and darkness. They were given regular rat meal pellets, which included an unrestricted supply of water along with 21% proteins, 3.48% fats, 3.71% raw fiber, and 1% multivitamins. The contents comprise limestone, hulled sunflower cake, soybean meal (44%), gluten of corn (60%), yellow maize, raw oil of soybean, methionine, a blend of minerals and vitamins along with an anti-fungicide. As well, water was constantly on hand for the experiment. The study's methodologies and procedures were carried out in compliance with the Institutional Care and Use Committee (IACUC), National Institutes of Health's regulations (NIH publication No. 85–23, modified 2011), the National Research Center in Egypt's Ethics Committee (registration number 513012023) and the ARRIVE guidelines [29]. Throughout the whole duration of the experiment any necessary steps were carried out to eliminate the rats' pain, suffering, and loss of weight.

**2.4.3. Experimental design.** In this study, rats were housed for 12 h a day, 12 h at night, with sufficient water and food to let them adjust to their surroundings. On the second day following adjusting, the rats were separated into 6 groups at random, of 6 rats per group. On the 7<sup>th</sup> day, every group of rats was divided into the following categories, except for the initial group that was given 1 ml/kg of ethanol (96%) with gavage [30].

**First group (normal):** normal rats; **second group (control):** ulcer control rats; **third group (standard group):** Omeprazole 20mg/kg [14]; **fourth, fifth, and sixth groups (experimental groups):** received PM-EtOH at a dose of 25, 50, and 100 mg/kg by intra-gastric force-feeding for 7 successive days before ulcer induction. To recreate the stress conditions caused by the drug intra-gastric force-feeding in the third through sixth groups, the first and second groups were given 10 mg/kg body mass normal saline (0.0.9%).

All necessary precautions were implemented to prevent and/or reduce the pain and/or suffering by performing actions like humanely eliminating the suffering or reducing it. From the first day until the experiment endpoint, animals were checked out a minimum of once a day, and subsequently twice a day. A qualified laboratory animal technologist conducted the tests and evaluations. The respiratory rates and efforts of every animal observed varied from weak to normal. Behavior, postural shifts, and mobility were also observed. Every day till the end of the experiment, the body weight of each rate was tracked individually. Additionally, a Universal Interface Device (UID) reader was employed once or twice throughout the day for determining body temperature. Before the planned euthanasia at the time of fulfilling humane endpoints, the animals' body temperatures were recorded using a non-contact electronic infrared thermometer (Lasergrip 774, Etekcity Inc., Anaheim, CA, USA) while they were being gently restrained by their scruffs. Upon completion of the experiment, all rats were humanely euthanized using an intraperitoneal injection of sodium phenobarbital (40–50 mg/kg). Euthanasia was carried out in line with certain behavioral signs of severe pain, such as hunched posture, reluctance to move, excessive licking of the abdomen, or guarding the abdominal area, particularly when the pain persisted despite the administration of analgesics

(meloxicam 2mg/kg ip). Throughout the experiment, no animals died early or before they reached a humane endpoint. All animals stayed in good health during the research, and no unexpected deaths occurred. The rats were subsequently disposed of in compliance with the recommendations established out through the National Research Center's Safety and Health Committee (NRC). Animal stomachs were rapidly removed, then parted along the larger curve, removing their contents in the process. The stomach tissue specimens were macroscopically examined to determine the stomach ulcer index after being gently cleaned with a cold saline solution buffered with phosphate to remove any blood clots. Between two filter papers, the stomach was dried and split into 3 parts; first part was utilized to prepare 10% homogenate *via* homogenization in ice-cold saline to evaluate oxidative stress markers and antioxidant characteristics, and then frozen at -20 °C. The remaining portion was maintained at -80 °C in preparation for a later Western blot examination. Ultimately, the third section was embedded in 10% formalin for histological examination.

**2.4.4. Macroscopical examination.** Using an X-10 magnifying lens, lesion counts were tallied on flattened stomach samples that were photographed. Calculations were used to determine the ulcer inhibition percentage (%I) and ulcer index (UI) in square mm<sup>2</sup>, slightly differently from the process pointed out by Takagi & Okabe [31]. Using a ruler, the surface of the wound was initially measured in this technique, and the degree of the ulcer was used to assess its severity (S1 Table).

**2.4.5. Histological analysis.** All animal groups' stomach tissues were divided into pieces, which were then cut up and preserved in 10% buffered formalin. After fixation, the samples were washed with water, and thereafter encased in paraffin wax. Subsequently, Hematoxylin and Eosin (H&E) were used to stain the 5µm thick slices of stomach tissue. In 10 independent high-power fields (40 x), the damage to the stomach mucosa and submucosa was evaluated, as stated by Bancroft & Gamble [32]. The pathological markers employed for the assessment of the stomach injury were inflammatory cellular infiltrates (score: 0–3), bleeding (score: 0–4), and epithelial cell loss (score: 0–3). These three half scores add up to the overall pathologic score.

**2.4.6. Immuno-histochemical studies of caspase-3 and TLR-4.** The test for immunohistochemistry was used to determine the expression of caspase-3 within the stomach tissues. Firstly, the paraffin-embedded stomach tissue pieces were rehydrated and waxed using alcohol. After that, the slices were kept in a 3% hydrogen peroxide condition to inhibit the body's natural peroxidase activity. After that, tissues were handled with rabbit polyclonal anti-TLR4, 1:50, Santa Cruz, CA, USA, and rabbit monoclonal anti-caspase-3 (EPR 18297) (ab 184787) (abcam). DAB (diaminobenzidine) was used to visualize the immunological response. Ten randomly chosen high-power fields (40X) were used to semi-quantitatively assess the immunological response according to the proportion of positively colored cells as stated by El-Gendy et al.2023 [6]. A scale of 0–3 was used to score the results; 1 represented positive staining in 30% of the cells or HPF, 2 represented positive coloring in 30% to 70% of the cells or HPF, and 3 represented positive coloring in more than 70% of the cells or HPF.

**2.4.7. Biochemical analysis (stomach homogenate preparation).** A polytron homogenizer operating at 40 °C was utilized to create a 10% homogenate in 0.05 M phosphate buffer (pH 7). The homogenate was centrifuged for 20 min at 10,000 rpm to extract the mitochondria, erythrocytes, nuclei, and broken cells. The cytoplasmic extract, or supernatant, was utilized to measure several biochemical parameters according to manufacturer's instructions.

**2.4.8. Measuring signs of oxidative stress.** Oxidative stress markers were estimated in stomach homogenates utilizing Bio Diagnostic Company products for MDA enzymatic colorimetric analysis and GSH at wavelength 534 nm based on the procedure of Ohkawa, *et al.* [33] and 405 nm based on the procedure of Tietze [34], respectively.

**2.4.9. Enzyme linked immunosorbent assay (ELISA).** The protein content of the tissue was assessed using the Bradford technique [35]. Protein levels of NLRP3 were determined using a Genei protein estimation kit from Aviva Systems Biology (Catalogue No.: KD0290), Daxing Industrial Development Zone, Beijing, China. MyD88 levels were measured using a Fine Test kit (Catalogue No.: ER1598) from Fine Test Company, Eastlake High-tech Development District, Wuhan, Hubei, China. TNF $\alpha$  levels were quantified using an ELISA kit from Elabscience Biotechnology Co., Ltd, USA (Catalogue No.: 2.4.10). Each ELISA kit was measured using an ELISA plate reader (Stat Fax 2200, Awareness Technologies, Florida, USA) at an optical density (OD) range of 490–630 nm.

**2.4.10. Western blot assay of Nuclear Factor Kappa B one (NF- $\kappa$ B), HMGB1.** Following the manufacturer's instructions, every uniform tissue sample was processed with the Ready Prep<sup>TM</sup> protein extraction kit (total protein) from Bio-Rad Inc. (Catalogue #163–2086). Bradford Protein Assay Kit (SK3041) for quantitative protein analysis was supplied by Bio Basic Inc. (Markham, Ontario, L3R 8T4 Canada). Each sample containing 20  $\mu$ g of protein was mixed with an equal volume of 2x Laemmli sample buffer, which consisted of 4% SDS, 10% 2-mercaptoethanol, 20% glycerol, 0.004% bromophenol blue, and 0.125 M Tris HCl. The mixtures were then heated at 95°C for 5 min to ensure complete protein denaturation before loading onto the polyacrylamide gel for electrophoresis.

The blot was then conducted on the BioRad Trans-Blot (Santa Cruz Biotechnology, Inc. California, USA) Turbo for 7 min at 25 V; to allow protein bands to transfer from gel to membrane in tris-buffered saline containing 3% bovine serum albumin (BSA) and Tween 20 (TBST) buffer, the membrane was occluded for one hour at normal temperature. The blocking buffer was composed of 20 mM Tris pH 7.5, 150 mM NaCl, 0.1% Tween 20, and 3% bovine serum albumin (BSA). As per the guidelines provided by the manufacturer, NF- $\kappa$ B and HMGB1 primary antibodies were diluted for TBST (Santa Cruz Biotechnology, California, USA, [www.scbt.com](http://www.scbt.com)). Each primary antibody solution was left to incubate on the blotted target protein overnight at 4 °C. The blot was washed three times with TBST for 5 min. The HRP-conjugated secondary antibody solution was treated with the blotted target protein (Goat anti-rabbit IgG-HRP-1mg Goat mab - Novus Biologicals) for one hour at normal temperature. For five minutes, the blot was washed three times with TBST.

Per the manufacturer's directions, the chemiluminescent substrate (Clarity<sup>TM</sup> Western ECL substrate, Bio-Rad cat#170–5060) was applied to the blot. The same quantities of the Clarity Western luminal/enhancer solution (solution A) and the peroxidase solution (solution B) were applied. The imager that recorded the chemiluminescent signals was based on a CCD camera. Using protein normalization on the Chemi Doc MP imager, image analysis software was used to evaluate the band intensity of the target proteins relative to the housekeeping protein,  $\beta$ -actin. [36].

## 2.5. Ultra-high-performance liquid chromatography coupled to electrospray ionization quadrupole time-of-flight mass spectrometry (UHPLC-ESI-qTOF-MS/MS) profiling of *P. maritimum*

The protocol that was previously described by Otify *et al.*, [37] was followed in the current study. A Waters ACQUITY I-Class UHPLC system with a Binary Solvent Module and FL Sample Manager was used to inject 2  $\mu$ L of the tested sample partially, using a method of partial injection. The Waters ACQUITY UHPLC BEH C-18 column (2.1 mm i.d  $\times$  50 mm length, 1.7  $\mu$ m particle size, Waters GmbH, Eschborn, Germany) was then used to perform the chromatographic separation at a flow rate of 300  $\mu$ L/min at 55 °C. Water (A; Barnstead<sup>TM</sup> Gen-Pure<sup>TM</sup>, Thermo Scientific<sup>TM</sup>), CH<sub>3</sub>CN (B; Chromasolv<sup>TM</sup>, for LC-MS, Honeywell Riedel de Haën<sup>TM</sup>), and formic acid (0.1% additive for LC-MS, LiChropur®, Merck) comprised

the eluting system. In order to apply the gradient elution, solvent B (3%, 1 min, isocratic) was added, rising to 95% B (within 7 min), then at 95% B (3 min), and finally, the column was re-equilibrated with 3% B (2.5 min). A hybrid qTOF mass spectrometer (Sciex TripleTOF 6600 LC-MS System, AB Sciex, Darmstadt, Germany) operating in negative ion mode was online infused with the column effluents. The ion spray voltage was operated at -4500 V, while the source temperature was maintained at 450 °C. Adjustments were made to the nebulizer, drying, and curtain gases at 85, 70, and 55 psig, respectively. MS specifications included: TOF-scan mode (accumulation time: 100 ms) was set at  $m/z$  ranging from 50 to 1500. 50 ms accumulation time at the collision potential (CE) of -40 V, collision energy spread (CES) of 10 V, and declustering potential (DP) of -35 V, the MS2 information-dependent acquisition (IDA) mode experiments (mass tolerance 25 ppm,  $m/z$  50–1500, intensity > 100, exclude isotope window 4 Da) were completed. The collision activation dissociation (CAD) gas used was nitrogen.

## 2.6. Statistical analysis

The data were presented as mean  $\pm$  Standard error (SE). One-way analysis of variance (ANOVA) was carried out using the Graph Pad Prism 8 software (Graph Pad, San Diego, CA, USA) and Tukey's post-hoc test for group comparisons. the difference was considered significant at  $p < 0.05$ .

## 3. Results

### 3.1. Acute toxicity of PM-EtOH extract

The rats treated with the plant extract showed no mortality or toxicity signs during this experiment. There were no modifications in body weight, aberrant physiological changes, or behavioral abnormalities at 2 g/kg dosages over 7 days. The rats showed no significant symptoms of toxicity at the orally administered doses.

### 3.2. Biological results

**3.2.1. Effect of PM-EtOH extract against EtOH-induced gastric ulcer.** The impact of PM-EtOH on the number of lesions in the stomach and severity induced by ethanol was determined. No macroscopic lesions were detected in the normal group. In ulcer-control group, there were severe gastrointestinal mucosal injuries, such as hyperemia as well as linear bleedings (Fig 1A), with a number of lesions  $20 \pm 0.71$  and severity of lesions  $70 \pm 3.16$ . In contrast, PM-EtOH pretreatment at three dosage levels: 25, 50, and 100 mg significantly reduced the numbers of lesions at  $7 \pm 0.55$ ,  $6 \pm 0.45$ ,  $4.4 \pm 0.4$  and severity as  $4 \pm 0.45$ ,  $2.6 \pm 0.24$ ,  $2.2 \pm 0.2$  compared to ethanol-induced group, within the same circumstances, omeprazole therapy significantly decreased number and severity as  $5.8 \pm 0.3$  and  $3.8 \pm 0.3$  respectively, after comparison with the control group (Fig 1B).

**3.2.2. Effect of PM-EtOH extract on stomach morphological changes induced by EtOH.** Table 1 reveals the total pathological score for each group's stomach damage. The stomachs of the normal group showed normal sub-mucosa, normal gastric mucosal epithelium, and normal gastric glands (Fig 2a and 3a). On the contrary, severe pathological alterations were demonstrated in the ulcer-control group, represented by extensive necrosis and desquamation of mucosal epithelium associated with hemorrhage (Fig 2b). The sub-mucosa of this group revealed sub-mucosal edema and intense inflammatory cellular infiltrates (Fig 3b). There was a notable improvement *via* a decline in the total pathologic score in the groups treated with omeprazole as well as other treatment groups. The stomachs of the omeprazole group revealed a clear repair, with proliferation of the gastric tubular glands, which appeared basophilic (Fig 2c). In this group, there were no signs of inflammatory

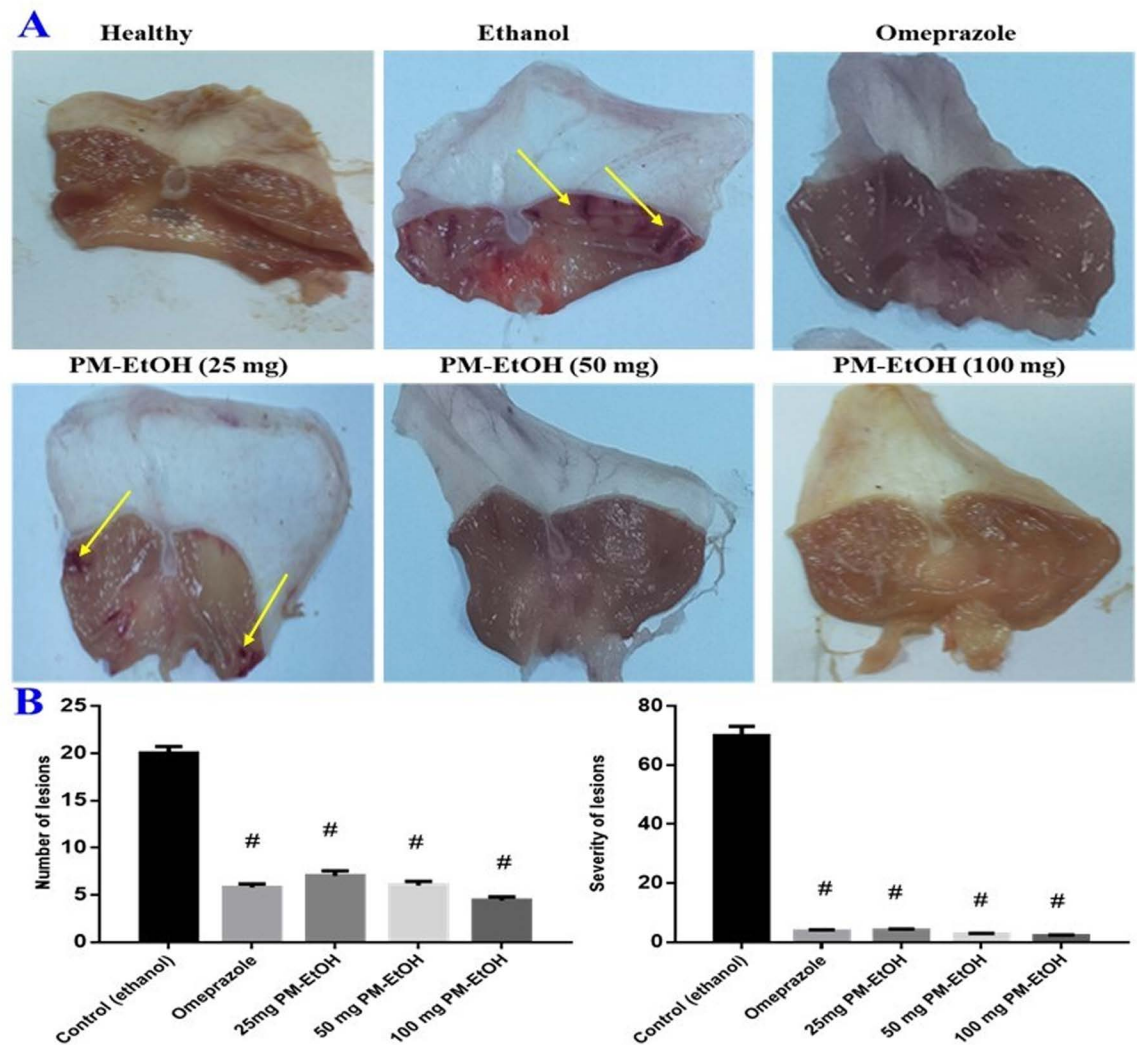

**Fig 1. Macroscopic results of the protective impacts of *P. maritimum* extract (PM-EtOH) on ethanol induced-stomach mucosal damage in rats.** (A) The normal group had no macroscopic lesions. Bands of hemorrhage were the result of significant lesions caused by ethanol to the control group's stomach mucosa. Omeprazole therapy (20 mg/kg) or PM-EtOH (25, 50, 100 mg/kg) notably decreased the lesions caused by gastric mucosal bleeding respectively, and (B) Ethanol induced gastric lesions. Each bar symbolizes the mean of 6 rats. SE; #  $P < 0.05$  vs. (control group), using one-way ANOVA then Tukey-Kramer multiple comparisons test.

<https://doi.org/10.1371/journal.pone.0321018.g001>

**Table 1. The total pathologic score for each group's stomach damage.**

| Overall pathologic score (mean $\pm$ SE) | Groups              |
|------------------------------------------|---------------------|
| 0.20 <sup>c</sup> $\pm$ 0.13             | Normal control      |
| 6.70 <sup>a</sup> $\pm$ 0.21             | Ulcer control group |
| 1.10 <sup>d</sup> $\pm$ 0.31             | Omeprazole          |
| 3.60 <sup>b</sup> $\pm$ 0.17             | 25 mg/kg PM-EtOH    |
| 2.40 <sup>c</sup> $\pm$ 0.42             | 50 mg/kg PM-EtOH    |
| 0.90 <sup>d,c</sup> $\pm$ 0.17           | 100 mg/kg PM-EtOH   |

SE: Standard error ( $\pm$ ); Means followed by different letters indicating significance. \*Significant differences at  $P < 0.05$

<https://doi.org/10.1371/journal.pone.0321018.t001>

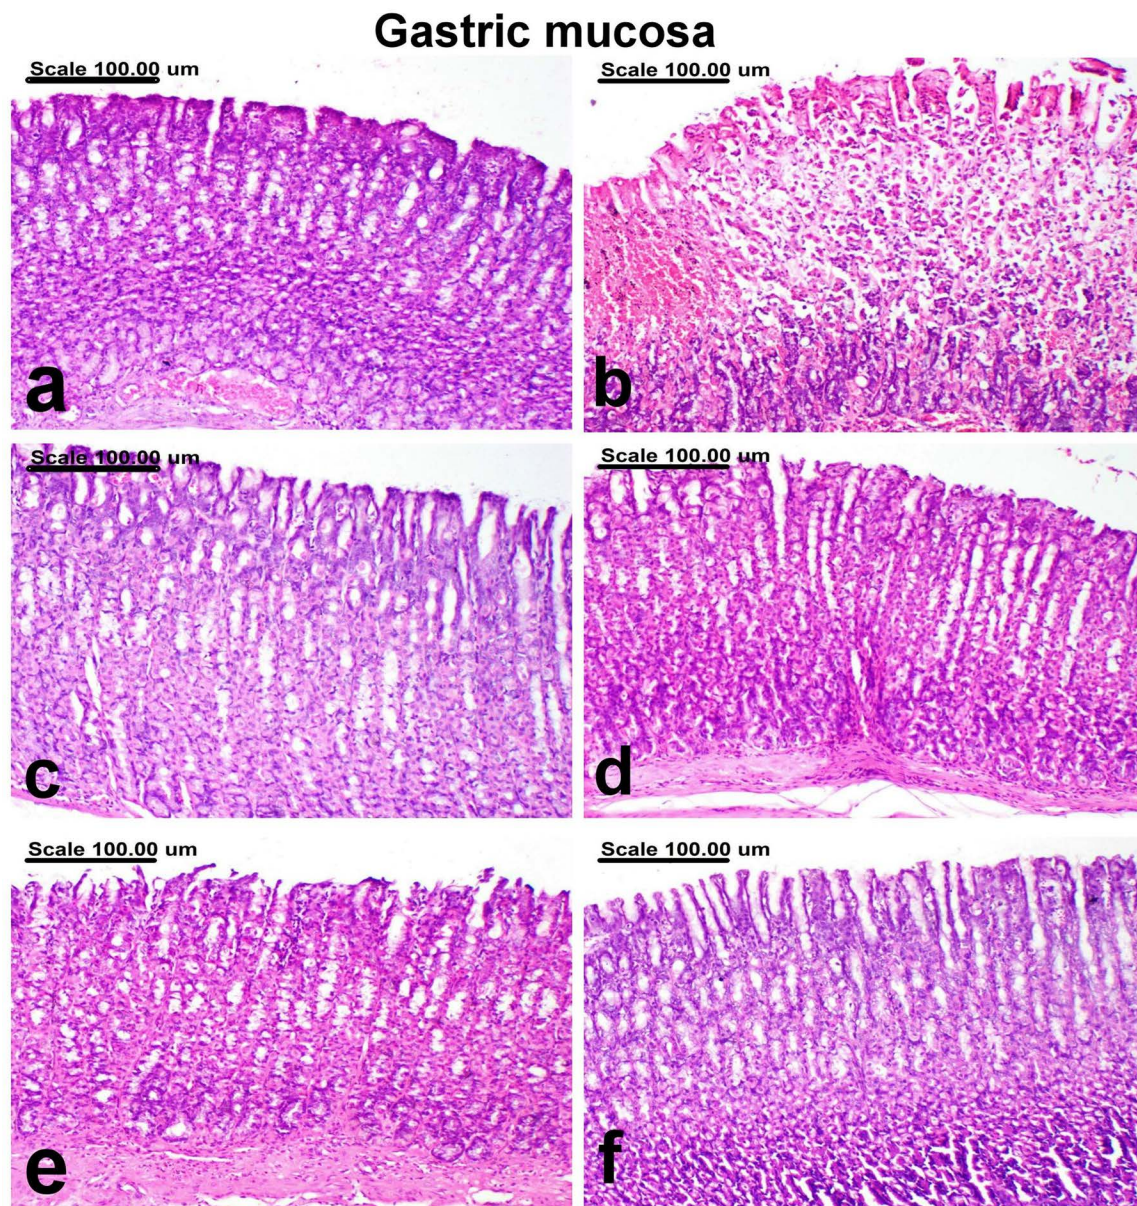

**Fig 2. A photomicrograph of the gastric mucosa.** (a) normal control group showing normal gastric mucosal epithelium, (b) ethanol group showing extensive necrosis and desquamation of mucosal epithelium associated with hemorrhage, (c) Omperazole group showing an attempt repair with proliferation of the gastric tubular glands, which appeared basophilic, (d) PM-EtOH (25 mg/kg) group showing normal gastric mucosal glands, (e) PM-EtOH (50 mg/kg) group showing necrosis of the superficial epithelial cells, (f) PM-EtOH (100 mg/kg) group showing regeneration of the gastric mucosal glands, which are lined with large basophilic vesicular nuclei. (Stain: H&E; Scale bar= 100μm).

<https://doi.org/10.1371/journal.pone.0321018.g002>

cellular infiltration in the submucosa (**Fig 3c**). A pronounced improvement was recorded in groups treated with PM-EtOH, with a reduction in the severity of histopathological lesions which appeared as improvement in histopathological features. Normal gastric mucosal glands and mild infiltration of the sub-mucosa with inflammatory cells were demonstrated in most examined sections of 25 mg/kg of PM-EtOH group (**Figs 2d** and **3d**). Focal erosion with necrosis of the superficial epithelial cells and limited inflammatory cell infiltration of

## Gastric submucosa

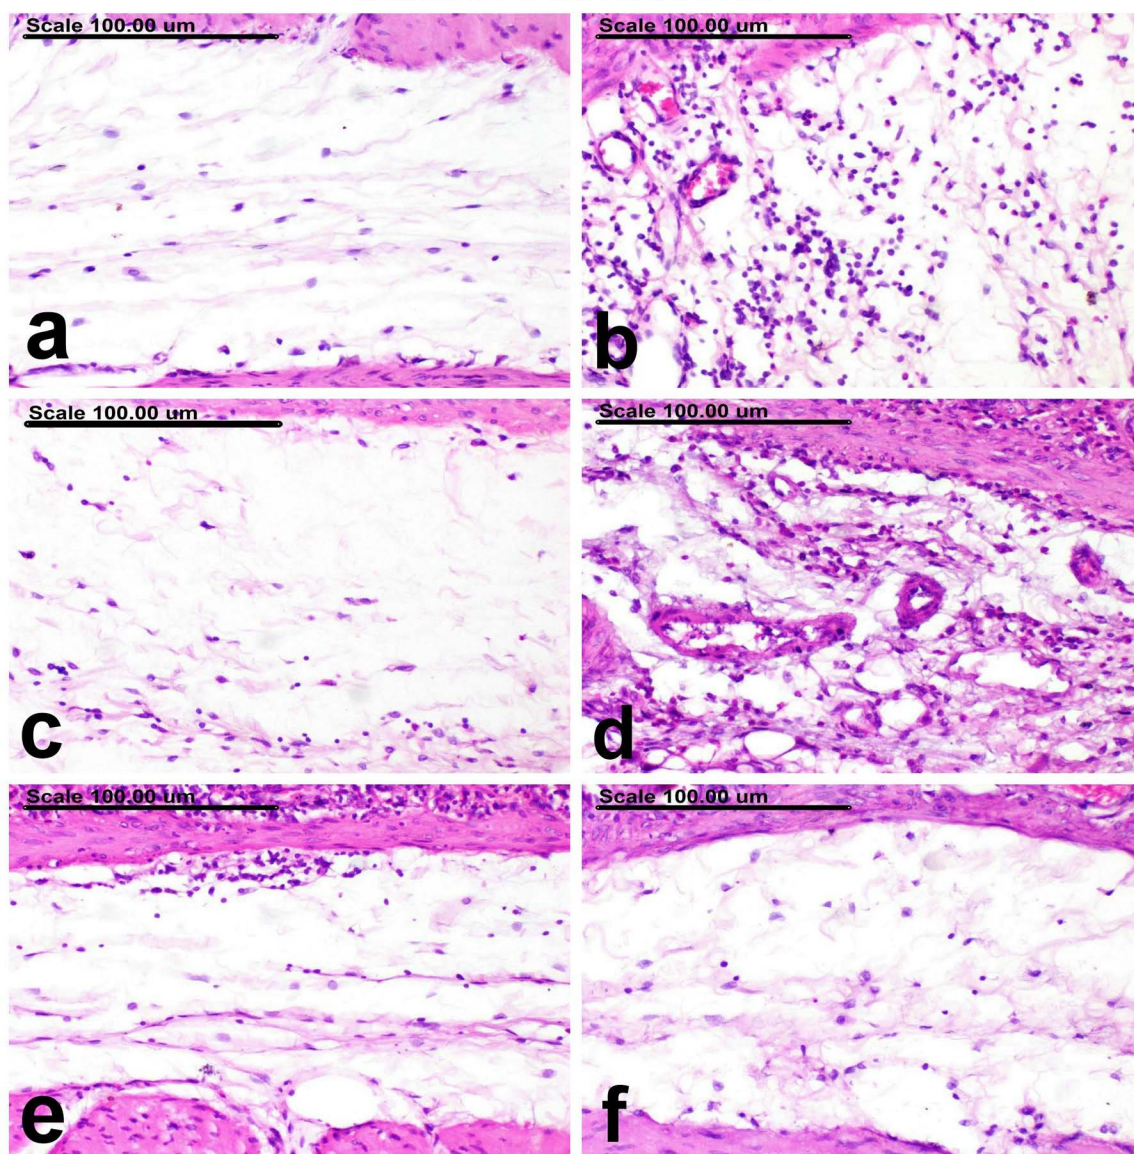

**Fig 3. A photomicrograph of the gastric submucosa.** (a) normal control group showing normal submucosa, (b) ethanol group showing intense infiltration of the submucosa with inflammatory cellular infiltrates, (c) Omeprazole group showing no inflammatory cellular infiltrates in the submucosa, (d) PM-EtOH (25 mg/kg) group showing mild infiltration of the submucosa with inflammatory cells, (e) PM-EtOH (50 mg/kg) group showing minimal infiltration of the submucosa with inflammatory cells, (f) PM-EtOH (100 mg/kg) group showing normal submucosa. (Stain: H&E; Scale bar= 100μm).

<https://doi.org/10.1371/journal.pone.0321018.g003>

the submucosa were characteristic features of 50 mg/kg of PM-EtOH group (Figs 2e and 3e). Individual apoptosis and regeneration of the gastric mucosal glands, which are lined with large basophilic vesicular nuclei, in addition to normal sub-mucosa, were detected in 100 mg/kg of PM-EtOH group (Figs 2f and 3f).

**3.2.3. Effect of PM-EtOH extract on stomach TLR4 and Caspase-3 immunohistochemical expression.** Table 2 summarizes the expression of TLR4 and caspase-3 in gastric tissues across different treatment groups. In normal rats, very few

**Table 2.** TLR4 and Caspase-3 expressions in the stomach tissues of treated and untreated groups.

| Caspase-3 expression<br>(% of positive cells/HPF) | TLR4 expression<br>(% of positive cells/HPF) | Groups              |
|---------------------------------------------------|----------------------------------------------|---------------------|
| 0.90 <sup>d</sup> ± 0.17                          | 0.40 <sup>c</sup> ± 0.16                     | Normal control      |
| 2.90 <sup>a</sup> ± 0.10                          | 2.50 <sup>a</sup> ± 0.22                     | Ulcer control group |
| 1.10 <sup>c,d</sup> ± 0.17                        | 0.80 <sup>c,d</sup> ± 0.20                   | Omeprazole          |
| 1.70 <sup>b</sup> ± 0.21                          | 1.30 <sup>b</sup> ± 0.15                     | 25 mg/kg PM-EtOH    |
| 1.60 <sup>b,c</sup> ± 0.22                        | 1.30 <sup>b</sup> ± 0.26                     | 50 mg/kg PM-EtOH    |
| 1.00 <sup>d</sup> ± 0.21                          | 0.70 <sup>c,d</sup> ± 0.21                   | 100 mg/kg PM-EtOH   |

SE: Standard error (±); Means followed by different letters indicating significance. \*Significant differences at  $P < 0.005$ .

<https://doi.org/10.1371/journal.pone.0321018.t002>

cells stained positively for TLR4 and caspase-3 (Figs 4a and 5a). However, in the ulcer control group, there was a significant increase in the expression of both markers, with a high percentage of cells showing intense brown staining (Figs 4b and 5b). In contrast, the expression of TLR4 and caspase-3 was significantly reduced in reference drug omeprazole (Figs 4c and 5c) and PM-EtOH-treated groups, particularly at 100 mg/kg, as evidenced by a lower percentage of cells stained positively. For treated rats, a dose-dependent decrease in TLR4 and caspase-3 expression was observed, with 25 and 50 mg/kg groups showing weak cytoplasmic staining (Figs 4d and 4e). Similarly, in these groups, caspase-3 expression was also reduced, with cells displaying moderate staining (Figs 5d and 5e). The 100 mg/kg group demonstrated weak expression of TLR4 and caspase-3, with a significant reduction compared to the ethanol group (Figs 4f and 5f).

**3.2.4. Effect of PM-EtOH extract on MDA, GSH, MyD88, NLRP3 & TNF- $\alpha$  levels.** Ethanol administration markedly increased MDA level (Fig 6A) simultaneously with a drop in GSH (Fig 6B) by 1.68 and 1.8 folds, respectively, after comparison with the normal group. In contrast, pre-medication in three doses of PM-EtOH (25, 50, and 100 mg/kg b.w.) markedly increased GSH levels concurrent with reduced MDA levels by 55.2%, 59.1%, 64.7% and 74.5%, 77.7%, 100.1% respectively, in comparison with the EtOH-induced group, in the identical circumstances, pre-treatment with omeprazole significantly reduced contents of MDA and increased that of GSH by 52.8% and 87.4%, respectively, after comparison with EtOH-induced group (Fig 6A & B).

Ethanol administration dramatically increased MyD88 (Fig 6C), NLRP3 (Fig 6D), and TNF- $\alpha$  levels (Fig 6E) by 3.8, 4.4, and 2.3 folds, respectively, in contrast to the normal group. In contrast, the three dosages of PM-EtOH administered 25, 50, and 100 mg/kg b.w. remarkably reduced the levels of MyD88, NLRP3, and TNF $\alpha$  by 27%, 38.5%, 62.4%; 24.8%, 42.2%, 66.5%, and 43.8%, 51.4%, 52.4% respectively, in contrast to the EtOH-induced group. In the same setting, omeprazole pretreatment dramatically reduced MyD88, NLRP3, and TNF- $\alpha$  by 51%, 41.3% and 44.4%, respectively, compared with EtOH-induced group.

**3.2.5. Effect of PM-EtOH extract on protein expression of HMGB1 and Nuclear Factor Kappa B (NF- $\kappa$ B).** The administration of ethanol markedly elevated HMGB1 protein expression level (Fig 7A) and NF- $\kappa$ B (Fig 7B) by 4.3 and 2.1 folds, respectively, in contrast to the normal group. In contrast, protein expression of HMGB1 and NF- $\kappa$ B was considerably reduced by pre-treatment with PM-EtOH at the three dose levels of (25, 50, and 100 mg/kg b.w) by 15.5%, 39.8%, 64.1% and 16.5%, 37.7%, 60.8% respectively, with EtOH-induced group. In the identical setting, omeprazole pre-treatment dramatically reduced HMGB1 and NF- $\kappa$ B protein expression by 6.5% and 46.1%, respectively, in comparison to the control group. (Fig 7).

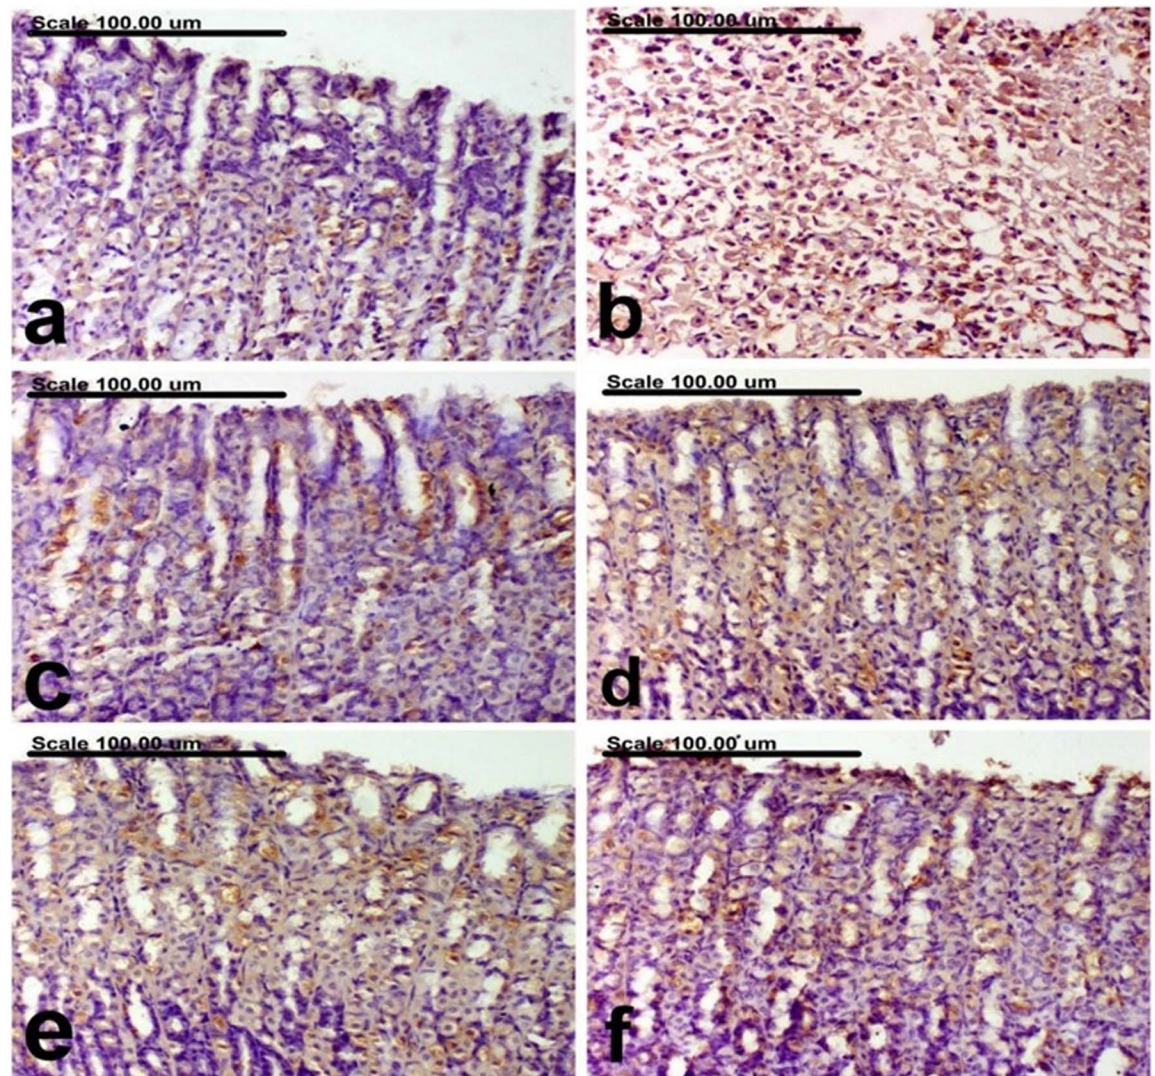

**Fig 4.** An immunohistochemically stained photomicrograph of the stomach mucosa using an anti-TLR4 antibody. (a) few TLR4-positively stained cells in the normal group; (b) the control ethanol group showed elevated TLR4 expression and a higher proportion of positive cells having deep brown coloring, (c) Omeprazole group showed reduction in the percentage of TLR4 positive cells with strong brown coloring, (d) PM-EtOH (25 mg/kg) group showed lowered percentage of TLR4 positive cells with weak cytoplasmic staining, (e) PM-EtOH (50 mg/kg) group showed decreased percentage of TLR4 positive cells, (f) PM-EtOH (100 mg/kg) group giving weak TLR4 expression, with a significant decrease in TLR4-positively stained cells (TLR4 immunohistochemical staining; Scale bar=100µm).

<https://doi.org/10.1371/journal.pone.0321018.g004>

### 3.3. UHPLC-ESI-qTOF-MS/MS metabolites profiling of *P. maritimum*

Eighty-four metabolites were annotated in PM-EtOH using both negative and positive ionization techniques (Table 3 & Fig 8). Metabolites were annotated *via* comparing their retention time, mass spectral data (molecular ion and daughter ions), and molecular formula with formerly published works and databases, like the GNPS library and the phytochemical dictionary of natural products. The identified phytochemicals and their chromatographic data are illustrated in Table 3 and Fig 8. Metabolites were eluted in accordance with their polarity in positive and negative ion modes. Phytochemicals belonged to several different chemical

groups, as amino acids, organic acids, phenolic acids, alkaloids, flavonoids, and fatty acids. Results revealed that both alkaloids and flavonoids were predominant in PM-EtOH. Positive ionization mode is considered a good representative for alkaloids, while most flavonoids were detected in negative ionization mode. Moreover, the chemical structures of major detected metabolites are displayed in Fig 9. Detailed interpretation of the putatively identified metabolites is described in the subsequent subsections.

**3.3.1. Amino acids.** Five amino acids and their derivatives were eluted early at Rt. 0.84–3.59 min as illustrated in Table 3 & Fig 8. From which three amino acids and two

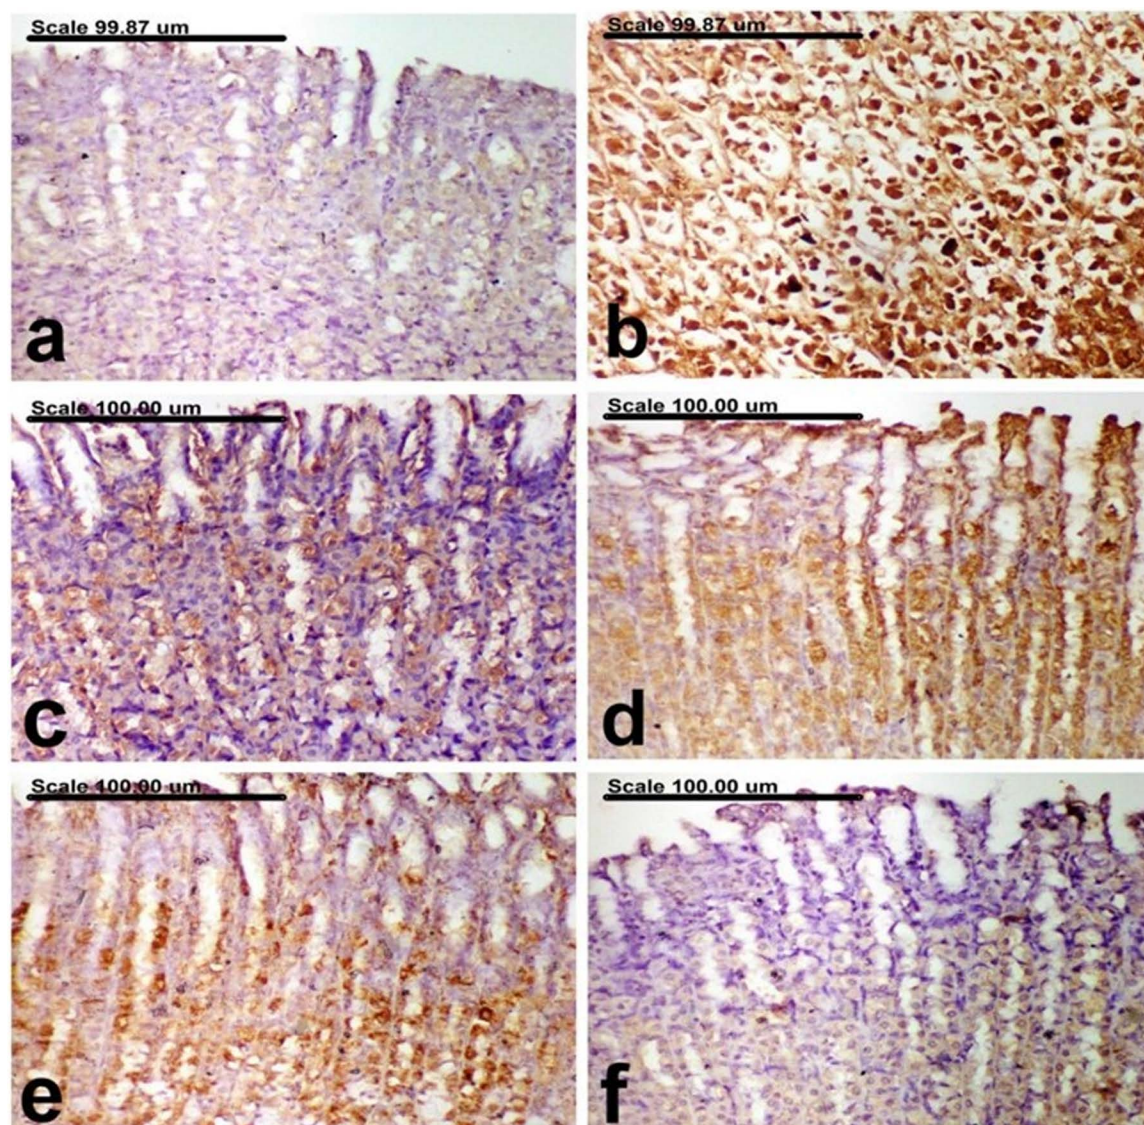

**Fig 5. Photomicrograph of the gastric mucosa colored with an anti-caspase-3 antibody.** The percentage of caspase-3 positive cells having strong brown coloring is reduced in the omeprazole group (c), while the control ethanol group (d) exhibited increased expression of caspase-3 and a higher percentage of positive cells with powerful brown cytoplasmic and/or nuclear coloring. (d) PM-EtOH (25 mg/kg) group showing decreased expression of caspase-3, along with the presence of moderately stained cells, (e) PM-EtOH (50 mg/kg) group showing decreased percentage of caspase-3 positive cells, (f) PM-EtOH (100 mg/kg) group showing weak caspase-3 expression, via a significant lowering in caspase-3-positively colored cells. (Caspase-3 immunohistochemical coloring; Scale bar= 100μm).

<https://doi.org/10.1371/journal.pone.0321018.g005>

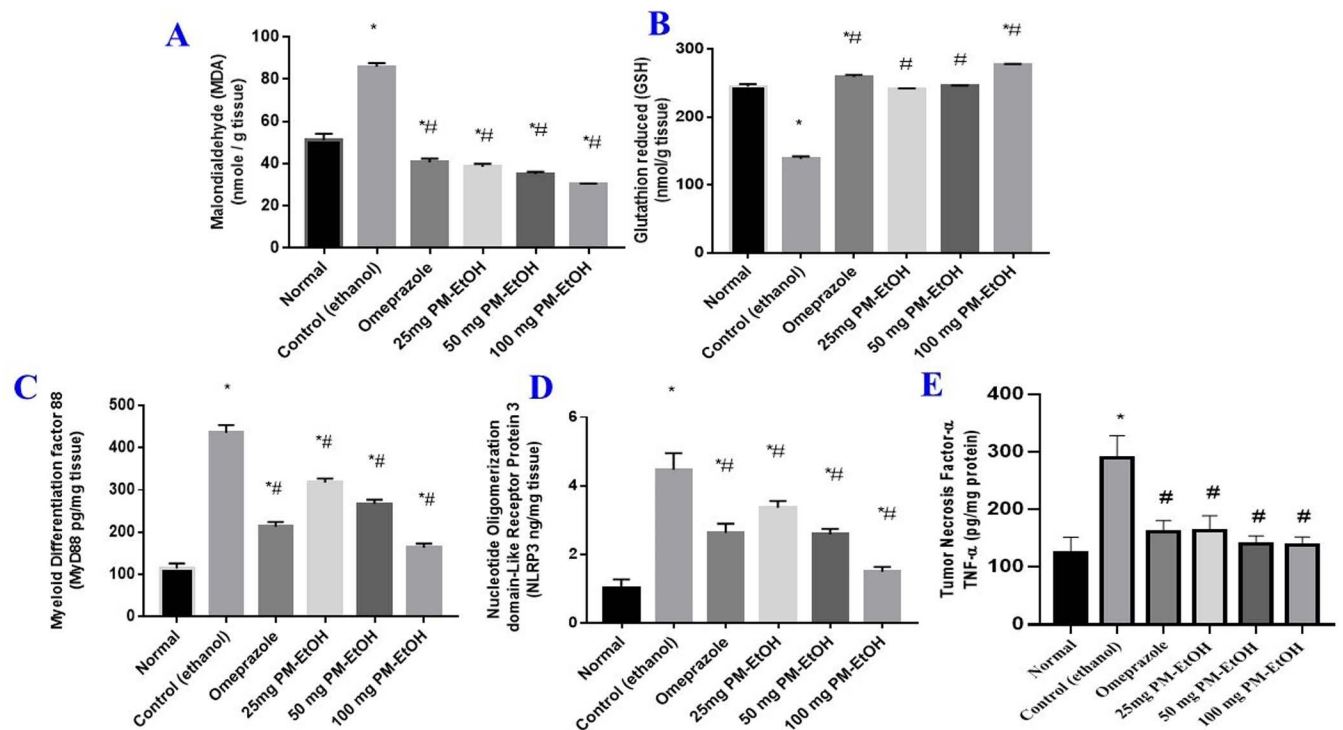

**Fig 6.** The effect of *P. maritimum* extract (PM-EtOH) on oxidative markers and inflammatory cytokines contents in rats with ethanol-induced stomach ulcers. (A) MDA, (B) GSH (C) MyD88, (D) NLRP3 and (E) TNF $\alpha$ . The mean of six rats is represented by each bar. SE; one-way ANOVA followed by the Tukey-Kramer multiple comparisons test; \*  $P < 0.05$  vs. (normal group) and #  $P < 0.05$  vs. (control group).

<https://doi.org/10.1371/journal.pone.0321018.g006>

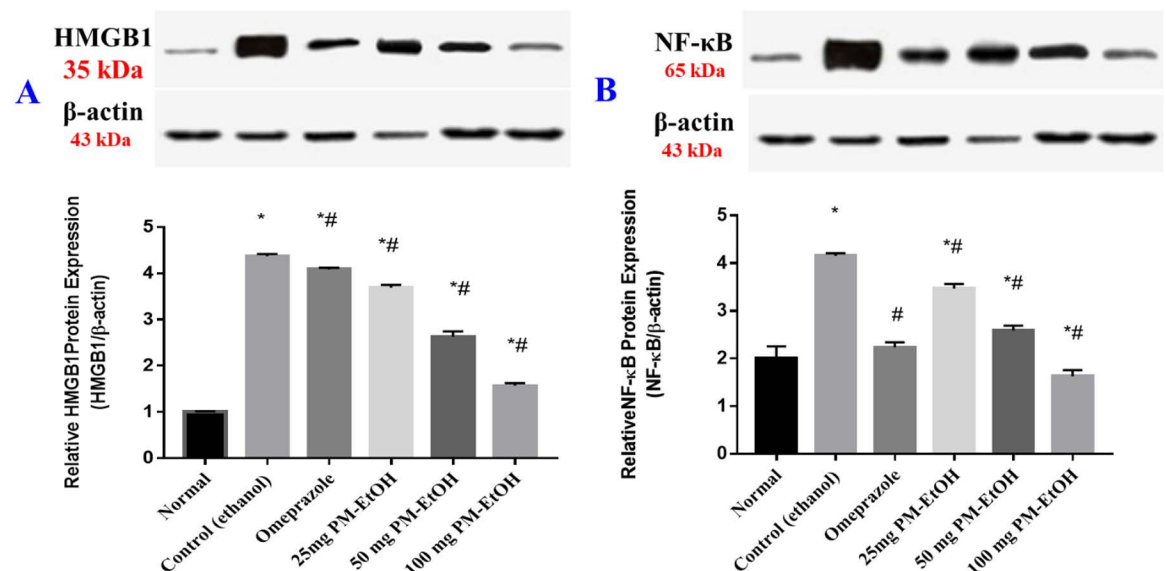

**Fig 7.** The effect of *P. maritimum* extract (PM-EtOH) on protein expression of (HMGB1) and (NF-  $\kappa$ B) in rats administered ethanol to develop stomach ulcers. The mean of six rats is represented by each bar. SE; one-way ANOVA followed by the Tukey-Kramer multiple comparisons test; \*  $P < 0.05$  vs. (normal group) and #  $P < 0.05$  vs. (control group). The raw uncropped Western Blotting plates were presented as supporting data (Raw WB).

<https://doi.org/10.1371/journal.pone.0321018.g007>

**Table 3.** UHPLC-ESI-qTOF-MS/MS based characterization of secondary metabolites of the *P. maritimum* ethanol extract (PM-EtOH) in both positive and negative ionization modes.

| No | R <sub>t</sub> | Compound name                              | Chemical class             | [M-H] <sup>-</sup> / [M+H] <sup>+</sup> | Molecular formula                                                          | Error (ppm) | MS <sup>2</sup> fragments                  |
|----|----------------|--------------------------------------------|----------------------------|-----------------------------------------|----------------------------------------------------------------------------|-------------|--------------------------------------------|
| 1  | 0.84           | Arginine                                   | Amino acid                 | 175.1185                                | C <sub>6</sub> H <sub>13</sub> N <sub>4</sub> O <sub>2</sub> <sup>+</sup>  | -6.2        | 158                                        |
| 2  | 0.98           | Xylonic acid                               | Sugar acid                 | 165.0405                                | C <sub>5</sub> H <sub>9</sub> O <sub>6</sub> <sup>-</sup>                  | 6.6         | 147, 129                                   |
| 3  | 0.98           | Gluconic acid                              | Sugar acid                 | 195.0510                                | C <sub>6</sub> H <sub>11</sub> O <sub>7</sub> <sup>-</sup>                 | 0.226       | 129, 89, 75                                |
| 4  | 0.99           | Disaccharide                               | Sugar                      | 377.0855                                | C <sub>18</sub> H <sub>32</sub> O <sub>16</sub> <sup>-</sup>               | 0.53        | 341, 215, 195                              |
| 5  | 1.03           | Maleic acid                                | Organic acid               | 115.0037                                | C <sub>4</sub> H <sub>4</sub> O <sub>4</sub> <sup>-</sup>                  | 0.75        | 89                                         |
| 6  | 1.03           | Hexosyl pyroglutamate                      | Amino acid                 | 290.0883                                | C <sub>11</sub> H <sub>16</sub> NO <sub>8</sub> <sup>-</sup>               | 0.68        | 128                                        |
| 7  | 1.12           | Galanthine                                 | Lycorine-type alkaloid     | 318.1705                                | C <sub>18</sub> H <sub>24</sub> NO <sub>4</sub> <sup>+</sup>               | 1.25        | 300, 288, 271, 268, 258 193, 162           |
| 8  | 1.46           | Citric acid                                | Organic acid               | 191.0196                                | C <sub>6</sub> H <sub>8</sub> O <sub>7</sub> <sup>-</sup>                  | 0.5         | 173, 129                                   |
| 9  | 1.47           | Coumaric acid                              | Hydroxy cinnamic acid      | 165.0544                                | C <sub>9</sub> H <sub>9</sub> O <sub>3</sub> <sup>+</sup>                  | -2.4        | 147, 123, 119                              |
| 10 | 1.49           | Chelidonic acid                            | Organic acid               | 185.0073                                | C <sub>7</sub> H <sub>4</sub> O <sub>6</sub> <sup>+</sup>                  | 5.3         | 141, 97                                    |
| 11 | 1.52           | Deoxy fructosyl leucine                    | Amino acid                 | 294.1534                                | C <sub>12</sub> H <sub>24</sub> NO <sub>7</sub> <sup>+</sup>               | -4.4        | 276, 258, 248, 230                         |
| 12 | 2.36           | Ungminorine-O-De-Me                        | Lycorine-type alkaloid     | 304.1170                                | C <sub>16</sub> H <sub>18</sub> NO <sub>5</sub> <sup>+</sup>               | -5.4        | 286, 274, 256, 245, 244 227, 215, 199, 177 |
| 13 | 2.72           | Phenylalanine                              | Amino acid                 | 166.0857                                | C <sub>9</sub> H <sub>12</sub> NO <sub>2</sub> <sup>+</sup>                | 3           | 120, 103                                   |
| 14 | 2.76           | Norgalantamine                             | Galanthamine-type alkaloid | 274.1424                                | C <sub>16</sub> H <sub>20</sub> NO <sub>3</sub> <sup>+</sup>               | -6.9        | 231, 213, 198                              |
| 15 | 3.2            | Narcislasine                               | Narcislasine-type alkaloid | 308.0750                                | C <sub>17</sub> H <sub>27</sub> NO <sub>4</sub> <sup>+</sup>               | 0.3         | 290, 272                                   |
| 16 | 3.2            | Caffeic acid-O- glucuronide                | Hydroxy cinnamic acid      | 355.0671                                | C <sub>15</sub> H <sub>15</sub> O <sub>10</sub> <sup>-</sup>               | 0.699       | 179, 85                                    |
| 17 | 3.22           | Piscidic acid                              | Hydroxy cinnamic acid      | 255.0508                                | C <sub>11</sub> H <sub>11</sub> O <sub>7</sub> <sup>-</sup>                | -0.9        | 193, 165                                   |
| 18 | 3.48           | Lycorine                                   | Lycorine-type alkaloid     | 288.1217                                | C <sub>16</sub> H <sub>18</sub> NO <sub>4</sub> <sup>+</sup>               | -3.8        | 270, 252, 227, 177                         |
| 19 | 3.56           | Indole-acrylic acid                        | Indole-type alkaloid       | 188.0701                                | C <sub>11</sub> H <sub>10</sub> NO <sub>2</sub> <sup>+</sup>               | -4.6        | 170, 146, 144, 118, 115                    |
| 20 | 3.59           | Tryptophan                                 | Amino acid                 | 203.0824                                | C <sub>11</sub> H <sub>11</sub> N <sub>2</sub> O <sub>2</sub> <sup>-</sup> | 2.9         | 188, 146                                   |
| 21 | 3.65           | Oduline                                    | Homolycorine-type alkaloid | 302.1382                                | C <sub>17</sub> H <sub>20</sub> NO <sub>4</sub> <sup>+</sup>               | -4.6        | 284, 266, 255, 193                         |
| 22 | 3.74           | Incratine                                  | Lycorine-type alkaloid     | 334.1631                                | C <sub>18</sub> H <sub>24</sub> NO <sub>5</sub> <sup>+</sup>               | 2.6         | 316, 302, 266, 284, 229, 191               |
| 23 | 3.8            | Unknown                                    | Unknown                    | 372.1080                                | C <sub>19</sub> H <sub>19</sub> NO <sub>7</sub> <sup>-</sup>               | 3.14        | 298, 211, 126                              |
| 24 | 3.82           | Ferulyl saccharic acid                     | Hydroxy cinnamic acid      | 385.0777                                | C <sub>16</sub> H <sub>17</sub> O <sub>11</sub> <sup>-</sup>               | 1.8         | 209, 191, 147                              |
| 25 | 3.94           | Haemanthidine                              | Crinane-type alkaloid      | 318.1327                                | C <sub>17</sub> H <sub>20</sub> NO <sub>5</sub> <sup>+</sup>               | 5           | 286, 268, 277, 225, 211, 199               |
| 26 | 4.06           | Tazettine                                  | Tazettine- type alkaloid   | 332.1467                                | C <sub>18</sub> H <sub>22</sub> NO <sub>5</sub> <sup>+</sup>               | -3.9        | 314, 300, 282, 264, 225, 199               |
| 27 | 4.16           | Eucomic acid                               | Hydroxy cinnamic acid      | 239.0561                                | C <sub>11</sub> H <sub>11</sub> O <sub>6</sub> <sup>-</sup>                | 2.09        | 195, 179, 149, 107                         |
| 28 | 4.19           | Tetra hydro- β- carboline- carboxylic acid | β-carboline-type alkaloid  | 215.0827                                | C <sub>12</sub> H <sub>11</sub> O <sub>2</sub> N <sub>2</sub> <sup>-</sup> | -3.2        | 171, 144                                   |
| 29 | 4.29           | Homolycorine                               | Homolycorine-type alkaloid | 316.1528                                | C <sub>18</sub> H <sub>22</sub> NO <sub>4</sub> <sup>+</sup>               | -6.32       | 300, 286, 268, 227, 207, 177               |
| 30 | 4.34           | Pancratistatin                             | Narcislasine-type alkaloid | 326.0857                                | C <sub>14</sub> H <sub>16</sub> NO <sub>8</sub> <sup>+</sup>               | 2.37        | 272, 244, 224, 222, 213, 208, 188          |
| 31 | 4.53           | Roseoside                                  | Norisoprenoid glycoside    | 431.1923                                | C <sub>19</sub> H <sub>29</sub> O <sub>8</sub> <sup>-</sup>                | -1.02       | 385, 223, 205                              |
| 32 | 4.54           | Methoxy coumarin (herniarin)               | Coumarin                   | 177.0540                                | C <sub>10</sub> H <sub>9</sub> O <sub>3</sub> <sup>+</sup>                 | -4.5        | 162, 149, 145, 115                         |
| 33 | 4.56           | Quercetin-O- di hexoside                   | Flavonol-O-glycoside       | 625.1401                                | C <sub>27</sub> H <sub>29</sub> O <sub>17</sub> <sup>-</sup>               | -1.5        | 461, 301                                   |
| 34 | 4.56           | Ungeremine                                 | Lycorine-type alkaloid     | 266.0799                                | C <sub>16</sub> H <sub>12</sub> NO <sub>3</sub> <sup>+</sup>               | -6.7        | 236, 208, 180, 167                         |
| 35 | 4.68           | Orientin                                   | Flavone-C-glycoside        | 447.0935                                | C <sub>21</sub> H <sub>19</sub> O <sub>11</sub> <sup>-</sup>               | 1.5         | 357, 327                                   |
| 36 | 4.72           | Isorhamnetin-O-dihexoside                  | Flavonol-O-glycoside       | 641.1693                                | C <sub>28</sub> H <sub>33</sub> O <sub>17</sub> <sup>+</sup>               | -2.7        | 479, 317                                   |
| 37 | 4.75           | Narseronine                                | Homolycorine-type alkaloid | 330.1319                                | C <sub>18</sub> H <sub>20</sub> NO <sub>5</sub> <sup>+</sup>               | -5.14       | 272, 239, 227, 199                         |
| 38 | 4.85           | Quercetin-O-pentoside-hexoside             | Flavonol-O-glycoside       | 595.1287                                | C <sub>26</sub> H <sub>27</sub> O <sub>16</sub> <sup>-</sup>               | -1.87       | 301                                        |
| 39 | 5.06           | Vitexin                                    | Flavone-C-glycoside        | 433.1113                                | C <sub>21</sub> H <sub>21</sub> O <sub>10</sub> <sup>+</sup>               | -3.8        | 415, 313, 271                              |
| 40 | 5.2            | Unknown                                    | Unknown                    | 277.1170                                | C <sub>14</sub> H <sub>17</sub> N <sub>2</sub> O <sub>4</sub> <sup>+</sup> | -4.23       | 231, 179, 166, 120                         |
| 41 | 5.5            | Kaempferol-O-rutinoside                    | Flavonol-O-glycoside       | 593.1505                                | C <sub>27</sub> H <sub>29</sub> O <sub>15</sub> <sup>-</sup>               | -1.6        | 285                                        |
| 42 | 5.52           | Kaempferol-O-pentosyl-hexoside             | Flavonol-O-glycoside       | 581.1486                                | C <sub>26</sub> H <sub>29</sub> O <sub>15</sub> <sup>+</sup>               | 3.8         | 449, 287                                   |
|    | 5.54           | Kaempferol-O-pentosyl-hexoside             | Flavonol-O-glycoside       | 579.1346                                | C <sub>26</sub> H <sub>27</sub> O <sub>15</sub> <sup>-</sup>               | 1.3         | 285                                        |

(Continued)

Table 3. (Continued)

| No | R <sub>i</sub> | Compound name                          | Chemical class              | [M-H] / [M+H] <sup>+</sup> | Molecular formula                                                          | Error (ppm) | MS <sup>2</sup> fragments         |
|----|----------------|----------------------------------------|-----------------------------|----------------------------|----------------------------------------------------------------------------|-------------|-----------------------------------|
| 43 | 5.62           | Isorhamnetin-O-rutinoside              | Flavonol-O-glycoside        | 623.1608                   | C <sub>28</sub> H <sub>31</sub> O <sub>16</sub> <sup>-</sup>               | 2.24        | 315                               |
|    | 5.63           | Isorhamnetin-O-rutinoside              | Flavonol-O-glycoside        | 625.1752                   | C <sub>28</sub> H <sub>33</sub> O <sub>16</sub> <sup>+</sup>               | 0.6         | 479, 317                          |
| 44 | 5.66           | Quercetin-O-hexoside                   | Flavonol-O-glycoside        | 463.0876                   | C <sub>21</sub> H <sub>19</sub> O <sub>12</sub> <sup>-</sup>               | 0.4         | 301                               |
| 45 | 5.96           | Ferulic acid                           | Hydroxycinnamic acid        | 193.0503                   | C <sub>10</sub> H <sub>9</sub> O <sub>4</sub> <sup>-</sup>                 | 1.07        | 178, 149, 134                     |
| 46 | 6.11           | Unknown                                | Unknown                     | 306.0255                   | C <sub>13</sub> H <sub>8</sub> NO <sup>-</sup>                             | 1.46        | 260, 252, 218, 188                |
| 47 | 6.54           | Unknown                                | Unknown                     | 223.1317                   | C <sub>13</sub> H <sub>18</sub> O <sub>3</sub> <sup>+</sup>                | 6.28        | 205, 195, 187, 181, 177, 121, 111 |
| 48 | 6.6            | Kaempferol-O-hexoside                  | Flavonol-O-glycoside        | 447.0928                   | C <sub>21</sub> H <sub>19</sub> O <sub>11</sub> <sup>-</sup>               | 0.22        | 285                               |
| 49 | 6.81           | Loliolide                              | Terpene lactone             | 197.1166                   | C <sub>11</sub> H <sub>17</sub> O <sub>3</sub> <sup>+</sup>                | -4.3        | 179, 161, 107                     |
| 50 | 6.95           | Isorhamnetin-O-hexoside                | Flavonol-O-glycoside        | 477.1030                   | C <sub>22</sub> H <sub>21</sub> O <sub>12</sub> <sup>-</sup>               | -0.2        | 315, 314                          |
| 51 | 7.36           | Oxo-ionol hexoside                     | Terpene glycoside           | 417.1967                   | C <sub>19</sub> H <sub>32</sub> O <sub>7</sub> <sup>+</sup> HCOOH          | -0.8        | 371, 179                          |
| 52 | 7.55           | Azelaic acid                           | Fatty acid                  | 187.0973                   | C <sub>9</sub> H <sub>15</sub> O <sub>4</sub> <sup>-</sup>                 | -1.87       | 143, 125                          |
| 53 | 7.78           | Ferulyl dopamine                       | Hydroxy cinnamic acyl amide | 328.1184                   | C <sub>18</sub> H <sub>18</sub> NO <sub>5</sub> <sup>-</sup>               | 2.38        | 175                               |
| 54 | 7.86           | Unknown                                | Unknown                     | 433.2312                   | C <sub>19</sub> H <sub>29</sub> N <sub>8</sub> O <sub>4</sub> <sup>+</sup> | 0.33        | 416, 360, 300, 253, 207, 179      |
| 55 | 8.34           | Kaempferol-O-rhamnoside                | Flavonol-O-glycoside        | 431.1339                   | C <sub>21</sub> H <sub>19</sub> O <sub>10</sub> <sup>-</sup>               | -2.3        | 285                               |
| 56 | 9.06           | p-Coumaryl tyramine                    | Hydroxy cinnamic acyl amide | 284.1263                   | C <sub>17</sub> H <sub>18</sub> NO <sub>3</sub> <sup>+</sup>               | 6.3         | 147                               |
| 57 | 9.75           | Ferulyl tyramine                       | Hydroxy cinnamic acyl amide | 314.1371                   | C <sub>18</sub> H <sub>20</sub> NO <sub>4</sub> <sup>+</sup>               | -3.6        | 177                               |
| 58 | 10.32          | Quercetin                              | Flavonol                    | 301.0400                   | C <sub>15</sub> H <sub>9</sub> O <sub>7</sub> <sup>-</sup>                 | -0.34       | 273, 178, 151                     |
| 59 | 10.53          | Unknown                                | Unknown                     | 211.1685                   | C <sub>13</sub> H <sub>23</sub> O <sub>2</sub> <sup>+</sup>                | 2.5         | 193, 175, 165, 135, 109           |
| 60 | 11.08          | Unknown                                | Unknown                     | 492.119                    | C <sub>28</sub> H <sub>29</sub> NO <sub>7</sub> <sup>+</sup>               | 6.3         | 462, 355, 337, 325                |
| 61 | 11.52          | Trimethoxy acetophenone                | Acetophenone                | 211.0694                   | C <sub>11</sub> H <sub>15</sub> O <sub>4</sub> <sup>+</sup>                | -4.9        | 193, 180, 120, 103                |
| 62 | 11.7           | Tri hydroxy octa-decanoic acid         | Fatty acid                  | 329.2300                   | C <sub>18</sub> H <sub>33</sub> O <sub>5</sub> <sup>-</sup>                | -0.6        | 309, 293, 279, 211                |
| 63 | 11.71          | Oxo-octadecadienoic acid               | Fatty acid                  | 295.2256                   | C <sub>18</sub> H <sub>31</sub> O <sub>3</sub> <sup>+</sup>                | 6.29        | 277, 259, 241, 189, 179           |
| 64 | 11.82          | Grossamide                             | Benzofuran carboxamide      | 623.2395                   | C <sub>36</sub> H <sub>35</sub> N <sub>2</sub> O <sub>8</sub> <sup>-</sup> | 2.7         | 486, 460, 331, 291                |
| 65 | 11.95          | Unknown                                | Unknown                     | 195.0700                   | C <sub>10</sub> H <sub>11</sub> O <sub>2</sub> <sup>-</sup>                | -0.3        | 180, 153, 120                     |
| 66 | 12.18          | Phytosphingosine                       | Sphingolipid                | 318.2989                   | C <sub>18</sub> H <sub>40</sub> NO <sub>3</sub> <sup>+</sup>               | 0           | 306, 285                          |
| 67 | 12.21          | Sakuranetin                            | Flavanone                   | 285.0768                   | C <sub>16</sub> H <sub>13</sub> O <sub>5</sub> <sup>-</sup>                | 1.05        | 179, 165                          |
| 68 | 12.24          | Unknown                                | Unknown                     | 181.1226                   | C <sub>11</sub> H <sub>17</sub> O <sub>2</sub> <sup>+</sup>                | 4.08        | 163, 135, 107                     |
| 69 | 12.3           | Unknown                                | Unknown                     | 213.1100                   | C <sub>11</sub> H <sub>17</sub> O <sub>4</sub> <sup>-</sup>                | -1.17       | 169, 96                           |
| 70 | 12.52          | Farrerol                               | Flavanone                   | 299.0928                   | C <sub>17</sub> H <sub>15</sub> O <sub>5</sub> <sup>-</sup>                | 0.47        | 282, 205, 179, 119                |
| 71 | 13.05          | Trihydroxyacetophenone-Di-methyl ether | Acetophenone                | 197.0804                   | C <sub>10</sub> H <sub>13</sub> O <sub>4</sub> <sup>+</sup>                | -0.8        | 179, 155                          |
| 72 | 14.08          | Hydroxyoctadecadienoic acid            | Fatty acid                  | 297.2061                   | C <sub>18</sub> H <sub>33</sub> O <sub>3</sub> <sup>+</sup>                | 0.9         | 279                               |
| 73 | 14.15          | Spiculisporic acid                     | Fatty acid                  | 329.1954                   | C <sub>17</sub> H <sub>29</sub> O <sub>6</sub> <sup>+</sup>                | 2.4         | 265, 237, 209                     |
| 74 | 14.46          | Linolenic acid derivative              | Fatty acid derivative       | 559.3113                   | C <sub>28</sub> H <sub>47</sub> O <sub>11</sub> <sup>-</sup>               | 1           | 277                               |
| 75 | 14.5           | Hydroxy linoleic acid                  | Fatty acid                  | 293.2117                   | C <sub>18</sub> H <sub>29</sub> O <sub>3</sub> <sup>-</sup>                | -0.46       | 277, 195                          |
| 76 | 16.27          | Unknown diterpene                      | Diterpene                   | 441.3206                   | C <sub>25</sub> H <sub>44</sub> O <sub>6</sub> <sup>+</sup>                | -0.8        | 421, 315, 291, 263, 209           |
| 77 | 16.32          | Linaloyl ethanolamide                  | Fatty acyl amide            | 324.2894                   | C <sub>20</sub> H <sub>38</sub> NO <sub>2</sub> <sup>+</sup>               | 1.2         | 306                               |
| 78 | 16.94          | Octadecatetraenoic acid                | Fatty acid                  | 277.2159                   | C <sub>18</sub> H <sub>29</sub> O <sub>2</sub> <sup>+</sup>                | -0.78       | 261, 243, 237, 223, 209, 173      |
| 79 | 16.95          | Palmitoyl ethanolamide                 | Fatty acyl amide            | 300.2893                   | C <sub>18</sub> H <sub>38</sub> NO <sub>2</sub> <sup>+</sup>               | -1.6        | 284, 283                          |
| 80 | 17.16          | Oleoyl ethanolamine                    | Fatty acyl amide            | 326.3036                   | C <sub>30</sub> H <sub>40</sub> NO <sub>2</sub> <sup>+</sup>               | 5.8         | 309                               |
| 81 | 17.51          | Unknown                                | Unknown                     | 609.2711                   | C <sub>34</sub> H <sub>41</sub> O <sub>10</sub> <sup>+</sup>               | 1.23        | 592, 550, 416                     |
| 82 | 17.59          | Linolenyl alcohol                      | Fatty alcohol               | 265.2526                   | C <sub>18</sub> H <sub>35</sub> O <sup>+</sup>                             | 6           | 247, 205, 191                     |
| 83 | 17.83          | Heptadecanamide                        | Fatty acyl amide            | 270.2789                   | C <sub>17</sub> H <sub>36</sub> NO <sup>+</sup>                            | -3          |                                   |
| 84 | 17.97          | Unknown                                | Unknown                     | 269.2914                   | C <sub>16</sub> H <sub>38</sub> NO <sup>+</sup>                            | -8.9        | 279, 266, 265, 238                |

R<sub>i</sub>: retention time<https://doi.org/10.1371/journal.pone.0321018.t003>

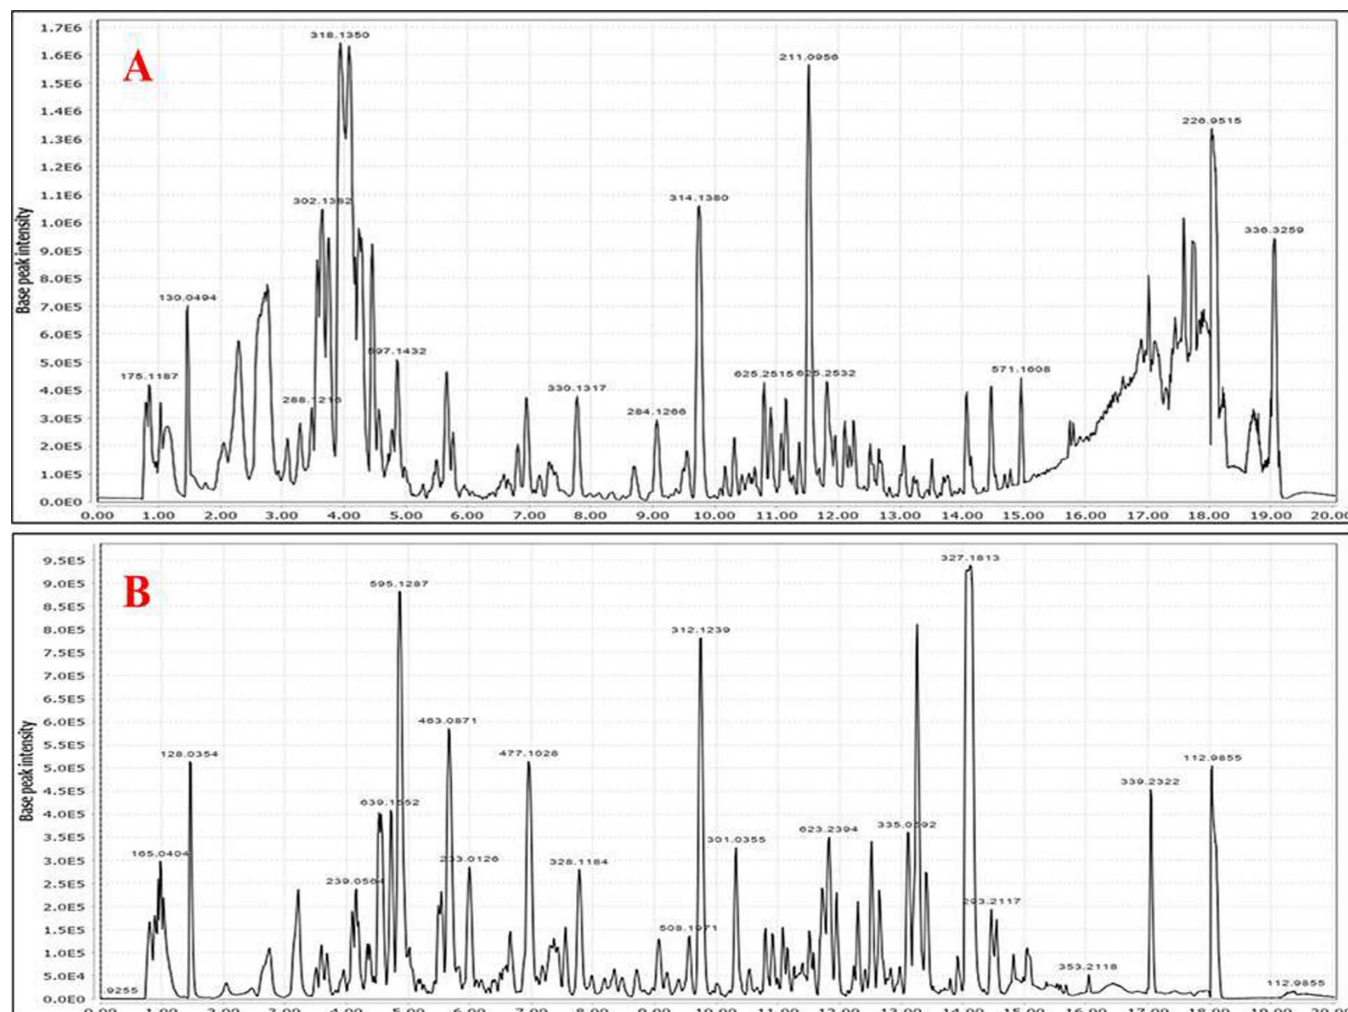

Fig 8. UHPLC-ESI-qTOF-MS/MS base peak chromatograms of *P. maritimum* ethanol extract (PM-EtOH). (A) positive ionization mode, and (B) negative ionization mode.

<https://doi.org/10.1371/journal.pone.0321018.g008>

derivatives were annotated in peaks 1, 6, 11, 13, and 20. Arginine, phenylalanine (S1 Fig) and tryptophan were detected in peaks 1, 13 and 20, respectively [38]. In general, the major fragments of amino acids result from deamination ( $-\text{NH}_2$ , 17 amu), decarboxylation ( $-\text{CO}_2$ , 44 amu), demethylation ( $-\text{CH}_3$ , 14 amu) and dehydration ( $-\text{H}_2\text{O}$ , 18 amu) of the molecular ion (S1 Fig) [39]. Peak 6 ( $m/z$  290.0883,  $\text{C}_{11}\text{H}_{16}\text{NO}_8^-$ ), showed a fragment ion at  $m/z$  128 due to the loss of hexose moiety from the molecular ion yielding free pyrrolutamic acid, and was assigned as hexosyl pyrrolutamate [39]. One sugar acylated amino acid was shown in peak 11 ( $m/z$  294.1534,  $\text{C}_{12}\text{H}_{24}\text{NO}_7^+$ ) with MS/MS ions at  $m/z$  276 [ $\text{M}+\text{H}-\text{H}_2\text{O}$ ] and 258 [ $\text{M}+\text{H}-2\text{H}_2\text{O}$ ], annotated as deoxy fructosyl leucine (S2 Fig) [38]. Both hexosyl pyrrolutamate and deoxy fructosyl leucine have been recognized firstly in *P. maritimum*.

**3.3.2. Organic acids.** Five organic acids were identified in PM-EtOH mainly in the negative ionization mode. Commonly, organic acids could be detected *via* the formation of some characteristic ions resulting from the decarboxylation and dehydration of the parent ion [40]. Notable identification included xylonic acid (peak 2,  $m/z$  165.0405) [40], gluconic acid (peak 3,  $m/z$  195.051) [38], malic acid (peak 5) and citric acid (peak 8) [41]. Malic acid

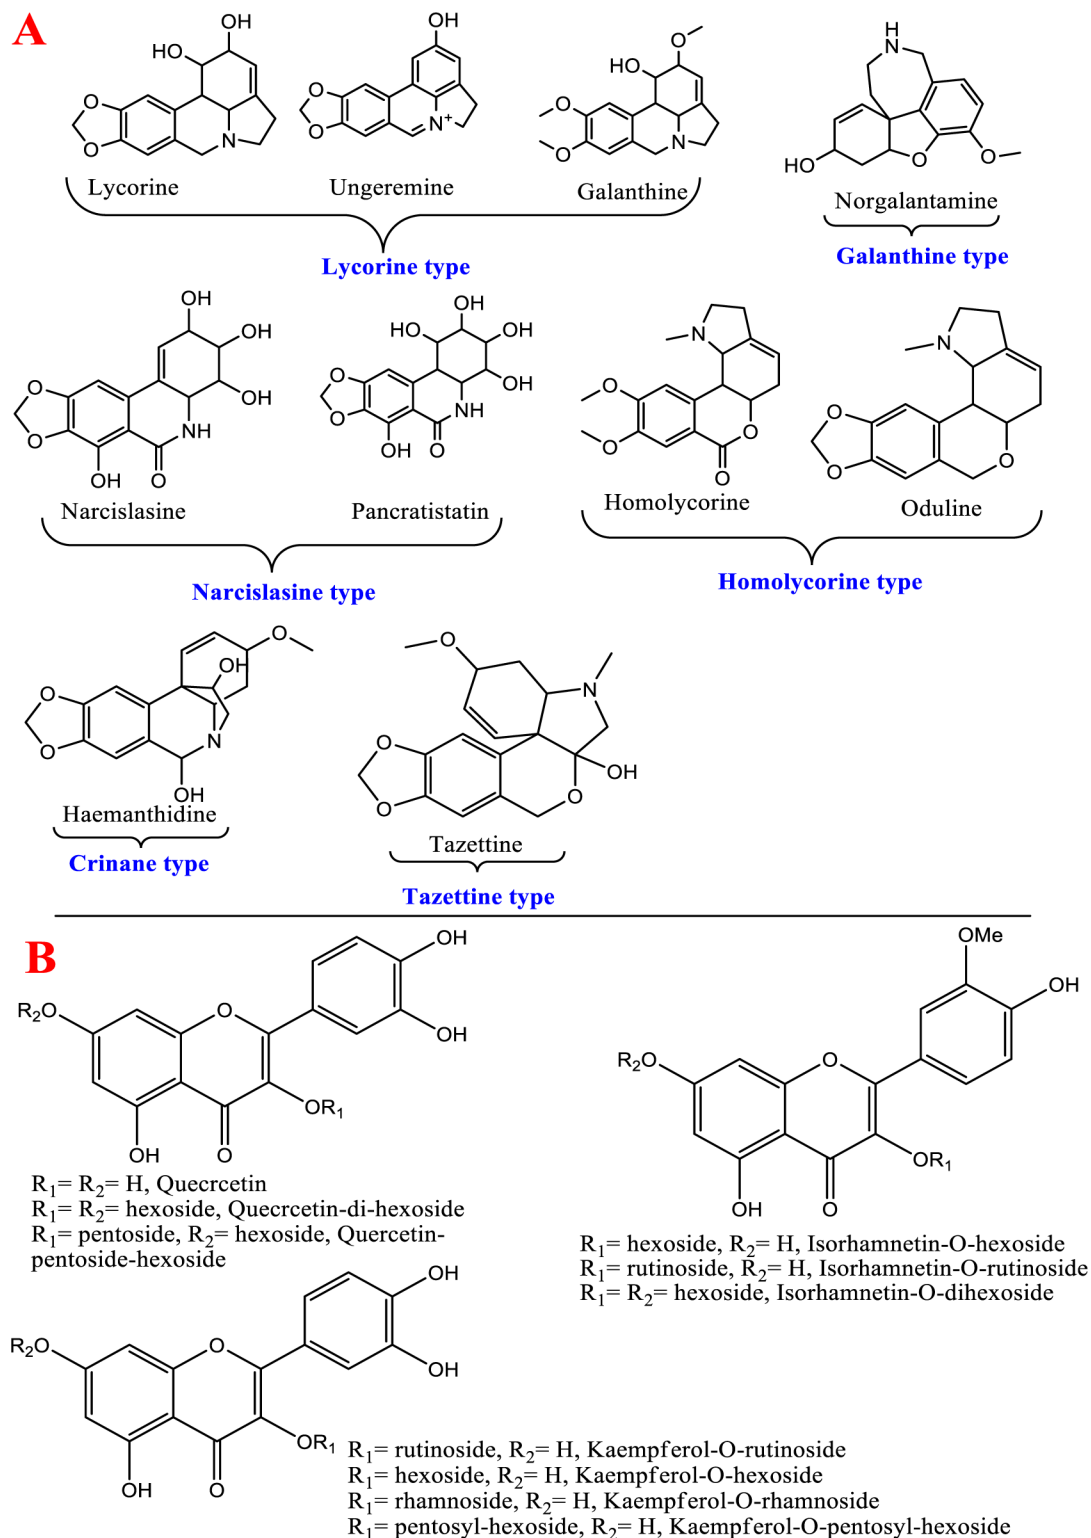

**Fig 9.** Representative chemical structures of major metabolites recognized in *P. maritimum* ethanol (PM-EtOH) extract via UHPLC-ESI-qTOF-MS/MS in negative and positive ion modes.

<https://doi.org/10.1371/journal.pone.0321018.g009>

and citric acid are common organic acids that contribute to organoleptic and antioxidant effects [42]. The fragmentation pattern of peak 10 ( $m/z$  185.0073,  $C_7H_4O_6^+$ ) was similar to that of chelidonic acid [43]. It showed daughter ions at  $m/z$  141  $[M+H-CO_2]^-$  and  $m/z$  97  $[M+H-2CO_2]^-$  previously reported in the *Pancreatum* genus.

**3.3.3. Phenolic acids and their derivatives.** Nine phenolic acids along with their derivatives were detected in both positive and negative ionization modes mainly hydroxy cinnamic acids either in their free form, or attached to sugar moiety, or aliphatic monoamines as illustrated in Table 3. In general, phenolic acids are detected via the loss of carboxylate group (-44 amu) to provide  $[M-H-COO]^-$  ion [44], besides the loss of methyl radical (-15 amu) for methoxylated phenolic acids to yield  $[M-H-CH_3]^-$  ion as in ferulic (peak 45,  $m/z$  193.0503) [45]. Peaks 9 and 17 were annotated as *p*-coumaric acid [38] and Piscidic acid (S3 Fig) [46], respectively. Herein, piscidic was reported for the first time in PM-EtOH. Peak 16 ( $m/z$  355.0671) showed a fragment ion at  $m/z$  179 which assigned to a caffeoyl moiety [39] confirming the attachment of the glucuronide moiety (176 amu) to caffeic acid, and identified as caffeic acid-*O*-glucuronide [47]. Peak 24 was tentatively annotated as feruloyl saccharic acid ( $m/z$  385.0777) [48], while peak 27 was identified as eucomic acid ( $m/z$  239.0561) [49]. Caffeic acid-*O*-glucuronide, feruloyl saccharic acid, and eucomic acid are documented for the first time in genus *Pancreatum*. Furthermore, UPLC analysis of PM-EtOH revealed the detection of 3 hydroxy cinnamoyl amides (HCAAs) belonging to phenolic acids attached to aliphatic monoamines or aryl polyamines. Feruloyl and *p*-coumaryl substituted amines are the commonly identified HCAAs in PM-EtOH detected at retention time from 7.78 to 9.75 min [50]. Peak 55 displayed  $M-H^-$  at  $m/z$  328.1184 with  $MS^2$  ion at  $m/z$  175 for the feruloyl moiety resulting from the amide bond cleavage and the loss of dopamine (-153 amu) [50], and assigned as feruloyl dopamine. Following the same fragmentation pattern, peaks 56 ( $m/z$  284.1263,  $C_{17}H_{18}NO_3^+$ ) and 57 ( $m/z$  314.1371,  $C_{18}H_{20}NO_4^+$ ) were annotated as *p*-coumaryl tyramine and feruloyl tyramine (S4 Fig).

**3.3.4. Alkaloids.** Family Amaryllidaceae is known to accumulate alkaloids to which various pharmacological activities are attributed [51]. Fifteen alkaloids and their derivatives have been tentatively recognized in PM-EtOH as shown in Table 3. Some alkaloids' chemical structures are displayed in Fig 9. These alkaloids showed different skeletons with diverse fragmentation patterns limiting level of confidence in assignment. There were 6 main groups of alkaloids identified based on their structures which are lycorine, homolycorine, galanthamine, narislaline, tazettine, and crinine types, in addition to few alkaloid derivatives. The MS/MS fragmentation data revealed the detection of 5 lycorine type alkaloids in peaks 7, 12, 18, 22, and 34. MS/MS fragmentation data of this type showed key fragments resulting from the RDA cleavages of ring B & C (S5 Fig). Other fragment ions derived from the successive loss of substituents from ring B [52]. On this context, peak 18 ( $m/z$  288.1217), accompanied with key fragment ion at  $m/z$  227 due to RDA cleavage of ring B with the loss of (-CHOH=CH<sub>2</sub>OH) and two fragments at  $m/z$  270  $[M+H-H_2O]^+$  and 252  $[M+H-2H_2O]^+$  (Table 3 & S5 Fig), was assigned as lycorine [53]. Following the same fragmentation pattern of lycorine, peaks 7, 22 and 34 were annotated as galanthine, incratine, and ungeremine, respectively [53]. Peak 12 ( $m/z$  304.117,  $C_{16}H_{18}NO_5^+$ ) showed successive loss of two hydroxyl groups of ring B at  $m/z$  286 and 268, with fragment ion at  $m/z$  243 (RDA cleavage) that matched with ungmiorine alkaloid [54] considering a mass difference of 14 amu (CH<sub>3</sub> radical), so it was annotated as ungmiorine-*O*-De-Me. It's the first time for the detection of ungmiorine-*O*-De-Me in PM-EtOH. Three homolycorine alkaloids appeared in peaks 21 ( $m/z$  302.1382), 29 ( $m/z$  316.1528), and 37 ( $m/z$  330.1319), and were identified as oduline, homolycorine and narseronine, respectively [53]. Norgalanthamine alkaloid (S6 Fig) was observed in peak 14 ( $m/z$  274.1424) [53]. Peak 25 ( $m/z$  318.1327,  $C_{17}H_{20}NO_5^+$ ) and 26 ( $m/z$  332.1467,  $C_{18}H_{22}NO_5^+$ ) were annotated as haemanthidine (S7 Fig) and tazettine [53]. Moreover, two narcislaline alkaloids were

detected in peaks **15** & **30** assigned as narcislasine [55] and pancratistatin [56]. Furthermore, peak **19** ( $m/z$  188.0701,  $C_{11}H_{10}NO_2^+$ ) showed MS<sup>2</sup> ion at  $m/z$  170, 142, and 115 was assigned as indole-acrylic acid [57]. Peak **28** ( $m/z$  215.0827,  $C_{12}H_{11}O_2N_2^+$ ) with daughter ions at  $m/z$  171 ( $-CO_2$ ) & 144 (RDA fragmentation) was annotated as a tetrahydro- $\beta$ -carboline-carboxylic acid [58]. Both indole-acrylic acid and tetra hydro- $\beta$ -carboline-carboxylic acid were first time detected in *P. maritimum*. Amaryllidaceous alkaloids, galanthamine, lycorine, narcislasine, and crinamine were reported to inhibit cyclooxygenase, NF $\kappa$ B activation, nitric oxide, and p-38 MAP kinase which are the key mediators of the inflammation process [59].

**3.3.5. Flavonoids.** Polyphenolics especially flavonoids amounted for the second major secondary metabolite class in many amaryllidaceous plants belonging to flavonols, flavones, flavanones, isoflavones, chalcones, and flavans types. Fifteen flavonoids were tentatively detected in ionization modes that are both positive and negative belonging to *O*-glucosyl flavonols as the most abundant. Regarding the nature of the attached sugar, it could be concluded through the respective loss of 162 amu, 132 amu, and 146 amu corresponding to hexose, pentose, and deoxyhexose [39]. Quercetin-*O*-glycosides were detected in peaks **33**, **38**, and **44** and assigned as quercetin-*O*-di-hexoside, quercetin-*O*-pentosyl-hexoside, and quercetin-*O*-hexoside, respectively [20]. Concerning isorhamnetin-*O*-glycosides, peaks **36**, **43**, and **50** were assigned as isorhamnetin-*O*-di-hexoside, isorhamnetin-*O*-rutinoside, and isorhamnetin-*O*-hexoside (S8 Fig), respectively [20] based on aglycone fragment ion of isorhamnetin at  $m/z$  315. Likewise, kaempferol-*O*-glycosides were detected in peaks **41**, **42**, **48**, & **55** assigned as kaempferol-*O*-rutinoside (S9 Fig), kaempferol-*O*-pentosyl-hexoside, kaempferol-*O*-hexoside & kaempferol-*O*-rhamnoside, respectively [20]. Flavonoid-*C*-glycoside exhibited a different fragmentation pathway resulting from cross ring cleavage of the sugar part with the loss of (-120 amu) and (-90 amu) for *C*-hexosides and (-60 amu) for *C*-pentosides [60] and detected in peaks **35** & **39**. The identified flavonoid-*C*-glycosides were flavone derivatives of luteolin and apigenin. For example, peak **35** ( $m/z$  447.0935,  $C_{21}H_{19}O_{11}^-$ ) with subsequent MS/MS ions at  $m/z$  357 [ $M-H-90$ ]<sup>-</sup>, and 327 [ $M-H-120$ ]<sup>-</sup> and annotated as orientin (luteolin-8-*C*-glucoside) [60], and likewise for vitexin in peak **39** [60]. This is the first report of orientin and vitexin in genus *Pancreaticum*. Compared to the abundance of flavonol subclass, flavanones appeared only in peaks **67** & **70**. Peak **67** ( $m/z$  285.0768,  $C_{16}H_{13}O_5^-$ ) with fragmentation behaviour as reported in sakuranetin [61] and reported first time in genus *Pancreaticum*. Peak **70** ( $m/z$  299.0928) was identified as farrerol (S10 Fig) [62]. In general, flavonoids are known to exert anti-inflammatory and anti-oxidant activities. But still, quercetin was known to exhibit anti-inflammatory and gastroprotective activities *in vivo* [63].

**3.3.6. Fatty acids/amides and shingolipids.** A total of 8 fatty acids and their derivatives were detected at  $R_t > 10.00$  min of the chromatogram. Peaks **52**, **62**, **63**, **72**, **73**, **74**, **75**, and **78** belonged to fatty acids, while fatty acyl amides appeared in peaks **77**, **79**, **80**, and **83**. Hydroxylated fatty acids were determined by the absence of H<sub>2</sub>O (18 amu) and carboxylate (44 amu) moieties from the main skeleton [39]. Saturated fatty acids included azelaic acid (peak 52), tri hydroxy octadecanoic acid (peak 62) and spiculisporic acid (peak 73) [39]. Unsaturated fatty acids were annotated as oxo-octadecadienoic acid (peak 63), hydroxyoctadecadienoic acid (peak 72), hydroxy linoleic acid (peak 75) and octadecatetraenoic acid (peak 78) [38,64]. Fatty acyl amide is a characteristic fatty acid subclass that was detected for the first time in *P. maritimum*, and suggestive that nitrogen is incorporated in lipophilic classes' besides from the more polar alkaloids. The chemical structure of fatty acyl amide is indicated by the fatty acid moiety's amide bond connection to ethanolamine [38] as evident from the loss of ammonia (-17amu). Accordingly, peaks **77**, **79**, **80**, and **83** were assigned as linaloyl ethanolamide, palmitoyl ethanolamide, oleoyl ethanolamine and heptadecanamide [38]. One sphingolipid

was detected the first time in the genus *Pancreaticum* appeared in peak **66** and was tentatively identified as phytosphingosine [65].

**3.3.7. Other compounds.** Other metabolite classes were also detected in PM-EtOH. Peak **31** showed  $M-H^-$  at  $m/z$  431.1923 with fragment ion at  $m/z$  385 due to loss of  $HCOOH$  and other  $MS^2$  ions similar to the fragmentation roseoside [66]. One terpene lactone appeared in peak **49** with  $[M+H]^+$  at  $m/z$  197.1166 was assigned as loliolide [67]. Peak **51** was annotated as oxo-ionol hexoside [68]. Peak **64** with  $[M-H]^-$  at  $m/z$  623.2395 was annotated as grossamide [69]. Roseoside, oxo-ionol hexoside, loliolide, and grossamide are reported first time in genus *Pancreaticum*. Two acetophenones appeared in peaks **61** & **71** assigned as tri-methoxy acetophenone (S11 Fig) and trihydroxyacetophenone-di-methyl ether [70].

## 4. Discussion

Stomach ulcer is a common digestive disorder that, if left untreated, can progress to more serious conditions, including stomach cancer [71]. In short, stomach ulcers result in a compromised state of health for the body alternative remedies are warranted for development as current medications do not offer complete safe cure [72]. Recently, efficient, safe, and widely available herbal treatments for stomach ulcers have emerged [73].

As ethanol-induced gastric ulcers resemble human ulcerative conditions in many ways, they might be useful to confirm the investigated agent's anti-ulcer properties and the most feasible pathways through the three aspects of apoptosis, inflammation, and oxidative stress. Other models, such as indomethacin or pyloric ligation, were not chosen for this purpose [74].

Rats given ethanol in the current study showed more widespread mucosal lesions, edema, and apoptotic cells. The lesions have been verified histologically by H&E stain, which revealed thorough obliteration of all gastrointestinal layers, along with inflammation, constriction of blood vessels, and infiltration of mononuclear cells in the sub-mucosa. According to [75], ethanol is a necrotizing agent that may easily penetrate the gastric mucosa and cause damage to the vascular system, leading to gastric ulcers. It also has a direct toxicity on the epithelium as a result of neutrophil infiltration in the tissue surrounding the stomach ulcer. In contrast, compared with the standard medication, omeprazole, a seven-day *P. maritimum* treatment ameliorated ethanol-induced stomach damage and promoted gastric recovery, along with decreased histopathological changes, apoptotic marker caspase-3, and an influx of leucocytes, indicating its anti-ulcer actions.

Our results showed that ethanol caused stomach mucosal damage by upsetting the oxidant/antioxidant equilibrium, which is consistent with other studies [76]. Considering that ethanol is connected to purine disintegration, it results in an excess of reactive oxygen species (ROS) being produced and triggering oxidative damage such as cell death, lipid peroxidation, and epithelial damage [77]. The elevated level of the lipid peroxidation marker malondialdehyde (MDA) and the concurrent reduction in GSH indicated a failure to neutralize free radicals derived from oxygen and lipids in a process to create lipid peroxides. These peroxides are recognized as a reason for the degradation of ion transport and membrane integrity, loss of membrane fluidity, and ultimately a diminution of cellular activity that comes in agreement with [78]. Conversely, treatment using PM-EtOH preserved GSH content and a decreased level of MDA in the stomach, suggesting its antioxidant action.

An essential component of the immune system, the NLRP3 inflammasome promotes the creation and activation of many inflammatory factors [79]. Both infections and endogenous stress can promote inflammation cascade. Following an inflammasome activation, autocatalytic initiation of caspase-1 facilitates the cleavage of pro-inflammatory cytokines to release mature inflammatory cytokines, for instance,  $TNF-\alpha$ , which consequently initiates the inflammatory response [80].

Alzokaky *et al.*, [14] revealed that HMGB1 is crucial to the healing of stomach ulcers. Chen *et al.*, [81] reported that HMGB1, a molecular pattern molecule linked to cause damage (DAMP) that mediates inflammation and immune responses through TLR-4, is a pro-inflammatory mediator that is typically found in the nucleus and attaches itself to chromatin. However, under conditions of elevated reactive oxygen species (ROS), it actively and passively shuttles from the cytoplasm into the nucleus and finally into the extracellular area, where it exhibits pro-inflammatory activity. This increases the amount of TLR4 and MyD88 and follows the production of NF- $\kappa$ B to enhance the TLR4/MyD88/NF- $\kappa$ B signaling pathway, producing TNF- $\alpha$ . [82]. TNF- $\alpha$  is known to impede stomach microcirculation surrounding the ulcerated mucosa, which diminishes the recuperation process, and in order to stimulate immunological cells through further NF- $\kappa$ B stimulation [74].

These results are consistent with the mechanism by which ethanol in this study caused inflammation. Specifically, excessive generation of reactive oxygen species (ROS) activated the NLRP3 inflammasome, which in turn accelerated the lysine acetylation of HMGB1, promoted its translocation and release from nucleus to cytoplasm, triggering TLR4 and MyD88 content. This process was then followed by activating signaling pathways involving NF- $\kappa$ B expression, which ultimately led to the production of TNF- $\alpha$ , resulting in inflammatory damage to the stomach [12,83].

According to studies, anti-inflammatory action plays a major role in preventing peptic ulcers. [84]. Manivannan and his co-workers [85] reported that HMGB1 might be a useful biomarker for brain damage, and inhibiting neuroinflammation could be a treatment strategy for several diseases. Consequently, down-regulation of HMGB1 expression may play a part in hastening the healing of stomach ulcers. Meng and his teamwork [86] revealed that inhibition of NF- $\kappa$ B and TNF- $\alpha$  production as pro-inflammatory cytokines, improves stomach ulcers caused by ethanol. Treatment with PM-EtOH resulted in significant [down regulation](#) of NLRP3 inflammasome and MGB1/TLR4/MYD88/NF- $\kappa$ B signaling pathway. Comparable outcomes were noted in omeprazole treated rats. The aforementioned results indicated a novel anti-inflammatory agent for gastric ulcers.

Recently, significant progress in chemical and pharmacological investigations has expanded our understanding of novel therapeutically effective substances derived from natural sources. The chemical, toxicological, and medicinal characteristics of natural active component classes, such as flavonoids, tannins, alkaloids, terpenoids, and fatty acids, have drawn the attention of researchers [87]. Herein, we have reported the presence of several phytochemicals via UHPLC-ESI-qTOF-MS/MS belonging to alkaloids and flavonoids as major classes. The effect of 13 alkaloidal subclasses namely: imidazole, indole, isoquinoline, non-nitrogen heterocycle alkaloid, phenylalkylamide, piperidine, pyrazine, pyridine, pyrrolidine, pyrrolizidine, quinolizidine, steroid and tropane alkaloids, in preventing and releasing gastric ulcer was reported using both human and animal models [87]. In models of ulcers generated by both acetylsalicylic acid (ASA) and stress, intravenous injection of rutaecarpine alkaloid at doses of 100 or 300 mg/kg greatly lowered the ulcer's severity grade and pH level in contrast to the placebo group [88]. 2-Phenylquinoline alkaloid hindered lesions caused by HCl/ethanol-induced ulcer model in rats, when administered at dose of 50 mg/kg [88]. As well, methoxycanthin-6-one alkaloid exhibited concentration-dependent preventive activity on gastric mucosa regarding indomethacin-induced gastric lesions in rats [88]. Alkaloids identified from *Mahonia bealei* possessed significant antiulcer activity mostly by impeding H<sup>+</sup>/K<sup>+</sup>-ATPase effect along with secretion of gastrin and gastric acid in pyloric ligation-induced rats [89]. Coptisine alkaloid exhibited anti-ulcer potential *via* inhibition of p38 MAPK and the activation of Nrf2 signaling pathway [90].

Conversely, flavonoids have been reported in several studies to possess both curative and preventive activity on gastric and intestinal epithelium. These activities may be attributed to preservation of the intestinal barrier, the uptake of lipids and carbohydrates, the alteration of

enzyme activities, the controlling of stomach secretions, the immune system, and interactions with pathogenic microorganisms. The prospected mechanisms for the antiulcer activity of flavonoids comprise suppression of acid production, raising gastric mucus and bicarbonate secretion, as well as reducing the level and activity of pepsin. Moreover, flavonoids strengthen the antibacterial, anti-inflammatory, antioxidative, and cytoprotective defenses of the mucosa against peptic ulcers [91]. Herein, three main flavonoids and their glycosides were accompanied by mostly detected in plant extract: namely, quercetin, kaempferol, and isorhamnetin. Quercetin prevented oxidative stress and inflammation caused by indomethacin in gastric mucosa and Caco-2 cells by increasing the nuclear translocation of nuclear factor related to erythroid 2 (Nrf2) and the activity of glutathione peroxidase (GPx) and superoxide dismutase (SOD). Additionally, quercetin ameliorated ICAM-1 and P-selectin production in addition to nuclear factor kappa B (NF- $\kappa$ B) activation brought on by indomethacin [92]. Kaempferol, another major flavonoid in PM-EtOH shields mice's stomach sores evoked by ethanol by preventing neutrophil buildup, diminishing myeloperoxidase (MPO) activity, and lowering levels of pro-inflammatory cytokines like TNF- $\alpha$ , IL-1 $\beta$ , and interleukin-6 (IL-6), while also increasing gastric mucus and NO. At a minimum inhibitory concentration (MIC) of 0.05 mMol/L, kaempferol also inhibited *H. pylori* growth *in vitro*. AGS gastric cancer cells have diminished levels of TNF- $\alpha$ , IL-1 $\beta$ , and interleukin-8 (IL-8) as a result of this activity, which also includes the production of the genes for cytotoxin-associated gene A (CagA) and vacuolating cytotoxin A (Vac A) [92]. Using rats as the bioassay model, the butanol fraction of *Sambucus ebulus* L. leaves showed strong antiulcerogenic action against the stress ulcer model caused by immobilization and water immersion. Isorhamnetin glucoside and quercetin glucoside detected as major flavonoids in PM-EtOH were reported to inhibit the inflammatory pathway, in addition to their antioxidant effect [93] to mediate for the improved action in PM-EtOH treated animal group.

## 5. Conclusion

This study serves as the initial report of the effect of *Pancreaticum maritimum* L. towards ethanol-induced gastric lesions in rats *via* multiple action mechanisms. This healing effect may be explained by blocking the initiation of the HMGB1/TLR4/MYD88/NF- $\kappa$ B signaling pathway, the NLRP3 inflammasome, and the suppression of apoptosis. This activity was attributed to several classes of phytochemicals in the extract identified via UHPLC-ESI-qTOF-MS/MS including alkaloids and flavonoids. This study suggests that PM-EtOH may be a novel, effective option in the management of ulcers. To thoroughly establish the dose-response relationship and identify the appropriate dosage required to achieve therapeutic effects, it is essential to conduct a comprehensive analysis. This includes determining the optimal dose through preclinical studies and validating the findings in clinical investigation to ensure the results are robust and conclusive. Furthermore, these findings should be compared against other ulcer models to evaluate the consistency and efficacy of the treatment across different experimental conditions. Such a multi-faceted approach ensures that the selected dosage is not only effective but also safe and reliable for clinical use. Individual compounds testing and standardization are essential actions in future research involving *P. maritimum* to be included in nutraceuticals for ulcer treatment.

## Supporting information

**S1 Data.** Raw WB The raw uncropped Western Blotting plates.  
(DOCX)

**S1 Table.** Gastric ulcer scoring system based on the severity of the ulcer.  
(DOCX)

**S1 Fig. MS/MS fragmentation pattern of phenylalanine.**  
(DOCX)

**S2 Fig. MS/MS fragmentation pattern of deoxy fructosyl leucine.**  
(DOCX)

**S3 Fig. MS/MS fragmentation pattern of piscidic acid.**  
(DOCX)

**S4 Fig. MS/MS fragmentation pattern of ferulyl tyramine.**  
(DOCX)

**S5 Fig. MS/MS fragmentation pattern of lycorine.**  
(DOCX)

**S6 Fig. MS/MS fragmentation pattern of norgalanthamine.**  
(DOCX)

**S7 Fig. MS/MS fragmentation pattern of haemnathidine.**  
(DOCX)

**S8 Fig. MS/MS fragmentation pattern of isorhamnetin-O-hexoside.**  
(DOCX)

**S9 Fig. MS/MS fragmentation pattern of kaempferol-O-rutinoside.**  
(DOCX)

**S10 Fig. MS/MS fragmentation pattern of farrerol.**  
(DOCX)

**S11 Fig. MS/MS fragmentation pattern of trimethoxy acetophenone.**  
(DOCX)

## Author contributions

**Conceptualization:** Mohamed A. Farag, Abdelsamed I. Elshamy.

**Data curation:** Zeinab A. El-Gendy, Ahmed M. Abd-ElGawad, Mohamed A. Farag, Abdelsamed I. Elshamy.

**Formal analysis:** Eman M. Abd El ghany, Zeinab A. El-Gendy, Ahmed M. Abd-ElGawad, Mohamed A. Farag, Abdelsamed I. Elshamy.

**Investigation:** Rehab F. Taher, Eman M. Abd El ghany, Zeinab A. El-Gendy, Mai M. Elghonemy, Heba A. Hassan, Gehad A. Abdel Jaleel, Ahmed M. Abd-ElGawad, Mohamed A. Farag, Abdelsamed I. Elshamy.

**Methodology:** Rehab F. Taher, Eman M. Abd El ghany, Zeinab A. El-Gendy, Mai M. Elghonemy, Heba A. Hassan, Gehad A. Abdel Jaleel, Azza Hassan, Ahmed M. Abd-ElGawad, Mohamed A. Farag, Abdelsamed I. Elshamy.

**Resources:** Abdelsamed I. Elshamy.

**Writing – original draft:** Rehab F. Taher, Eman M. Abd El ghany, Zeinab A. El-Gendy, Mai M. Elghonemy, Heba A. Hassan, Gehad A. Abdel Jaleel, Azza Hassan, Tushar C. Sarker, Ahmed M. Abd-ElGawad, Mohamed A. Farag, Abdelsamed I. Elshamy.

**Writing – review & editing:** Rehab F. Taher, Eman M. Abd El ghany, Zeinab A. El-Gendy, Gehad A. Abdel Jaleel, Tushar C. Sarker, Mohamed A. Farag, Abdelsamed I. Elshamy.

## References

- Muhialdin AJ, Alamri ZZ, Hussein AM, Faraj RK, Taha ZB, Hussein MM, et al. Gastro-Protective and Therapeutic Effect of *Punica granatum* against Stomach Ulcer Caused by *Helicobacter Pylori*. *Cell Mol Biol (Noisy-le-grand)*. 2023;69(1):48–53. <https://doi.org/10.14715/cmb/2022.69.1.9> PMID: [37213156](https://pubmed.ncbi.nlm.nih.gov/37213156/)
- Pasha MM, Divya R. Rise in incidence of perforated peptic ulcer in young-age in the trends in etiology. *Int Surg J*. 2022;9(6):1156. <https://doi.org/10.18203/2349-2902.isj20221403>
- Gehlod M, Gupta N. A review on the antiulcer activity on various herbal plants. *World Journal of Pharmaceutical Research*. 2021;10(4):379–86.
- Pham-Huy C, Huy BP. *Food and Lifestyle in Health and Disease*: CRC Press; 2022.
- Hsu H, Siwiec R. StatPearls [Internet]. StatPearls Publishing. Treasure Island, FL. 2022.
- El-Gendy ZA, Taher RF, Elgamal AM, Serag A, Hassan A, Jaleel GAA, et al. Metabolites profiling and bioassays reveal *bassia indica* ethanol extract protective effect against stomach ulcers development via HMGB1/TLR-4/NF- $\kappa$ B pathway. *Antioxidants (Basel)*. 2023;12(6):1263. <https://doi.org/10.3390/antiox12061263> PMID: [37371993](https://pubmed.ncbi.nlm.nih.gov/37371993/)
- Gupta M, Kapoor B, Gupta R, Singh N. Plants and phytochemicals for treatment of peptic ulcer: An overview. *South African Journal of Botany*. 2021;138:105–14. <https://doi.org/10.1016/j.sajb.2020.11.030>
- Miethke M, Pieroni M, Weber T, Brönstrup M, Hammann P, Halby L, et al. Towards the sustainable discovery and development of new antibiotics. *Nat Rev Chem*. 2021;5(10):726–49. <https://doi.org/10.1038/s41570-021-00313-1> PMID: [34426795](https://pubmed.ncbi.nlm.nih.gov/34426795/)
- Celebi Sözüner Z, Cevhertas L, Nadeau K, Akdis M, Akdis CA. Environmental factors in epithelial barrier dysfunction. *J Allergy Clin Immunol*. 2020;145(6):1517–28. <https://doi.org/10.1016/j.jaci.2020.04.024> PMID: [32507229](https://pubmed.ncbi.nlm.nih.gov/32507229/)
- Sofiadis K, Josipovic N, Nikolic M, Kargapolova Y, Übelmesser N, Varamogianni-Mamatsi V, et al. HMGB1 coordinates SASP-related chromatin folding and RNA homeostasis on the path to senescence. *Mol Syst Biol*. 2021;17(6):e9760. <https://doi.org/10.15252/msb.20209760> PMID: [34166567](https://pubmed.ncbi.nlm.nih.gov/34166567/)
- Shaker ME. The contribution of sterile inflammation to the fatty liver disease and the potential therapies. *Biomed Pharmacother*. 2022;148:112789. <https://doi.org/10.1016/j.biopha.2022.112789> PMID: [35272137](https://pubmed.ncbi.nlm.nih.gov/35272137/)
- Wang X, Yu H, Wang C, Liu Y, You J, Wang P, et al. Chronic ethanol exposure induces neuroinflammation in H4 cells through TLR3 / NF- $\kappa$ B pathway and anxiety-like behavior in male C57BL/6 mice. *Toxicology*. 2020;446:152625. <https://doi.org/10.1016/j.tox.2020.152625> PMID: [33161052](https://pubmed.ncbi.nlm.nih.gov/33161052/)
- Yu J, Jiang Q, Liu N, Fan D, Wang M, Zhao Y. Apigenin and apigenin-7, 4'-O-diocanoate protect against acrolein-aggravated inflammation via inhibiting the activation of NLRP3 inflammasome and HMGB1/MYD88/NF- $\kappa$ B signaling pathway in Human umbilical vein endothelial cells (HUVEC). *Food Chem Toxicol*. 2022;168:113400. <https://doi.org/10.1016/j.fct.2022.113400> PMID: [36055550](https://pubmed.ncbi.nlm.nih.gov/36055550/)
- Alzokaky AA-M, Abdelkader EM, El-Dessouki AM, Khaleel SA, Raslan NA. C-phycocyanin protects against ethanol-induced gastric ulcers in rats: Role of HMGB1/NLRP3/NF- $\kappa$ B pathway. *Basic Clin Pharmacol Toxicol*. 2020;127(4):265–77. <https://doi.org/10.1111/bcpt.13415> PMID: [32306544](https://pubmed.ncbi.nlm.nih.gov/32306544/)
- Wang Y, Che M, Xin J, Zheng Z, Li J, Zhang S. The role of IL-1 $\beta$  and TNF- $\alpha$  in intervertebral disc degeneration. *Biomed Pharmacother*. 2020;131:110660. <https://doi.org/10.1016/j.biopha.2020.110660> PMID: [32853910](https://pubmed.ncbi.nlm.nih.gov/32853910/)
- Sharifi-Rad M, Fokou PVT, Sharopov F, Martorell M, Ademiluyi AO, Rajkovic J, et al. Antiulcer Agents: From Plant Extracts to Phytochemicals in Healing Promotion. *Molecules*. 2018;23(7):1751. <https://doi.org/10.3390/molecules23071751> PMID: [30018251](https://pubmed.ncbi.nlm.nih.gov/30018251/)
- Berkov S, Evstatieva L, Popov S. Alkaloids in bulgarian *Pancreaticum maritimum* L. *Zeitschrift für Naturforschung C*. 2004;59(1–2):65–9.
- Cicio A, Sut S, Dall'Acqua S, Bruno M, Luparello C, Serio R, et al. Chemical Characterization and Cytotoxic and Antioxidant Activity Evaluation of the Ethanol Extract from the Bulbs of *Pancreaticum maritimum* Collected in Sicily. *Molecules*. 2023;28(10):3986. <https://doi.org/10.3390/molecules28103986> PMID: [37241726](https://pubmed.ncbi.nlm.nih.gov/37241726/)
- Ibrahim SRM, Mohamed GA, Shaala LA, Youssef DTA. Non-alkaloidal compounds from the bulbs of the Egyptian plant *Pancreaticum maritimum*. *Z Naturforsch C J Biosci*. 2014;69(3–4):92–8. <https://doi.org/10.5560/znc.2013-0111> PMID: [24873029](https://pubmed.ncbi.nlm.nih.gov/24873029/)
- Rokbeni N, M'rabet Y, Cluzet S, Richard T, Krisa S, Boussaid M, et al. Determination of phenolic composition and antioxidant activities of *Pancreaticum maritimum* L. from Tunisia. *Industrial Crops and Products*. 2016;94:505–13. <https://doi.org/10.1016/j.indcrop.2016.09.021>

21. Youssef DTA, Shaala LA, Altyar AE. Cytotoxic phenylpropanoid derivatives and alkaloids from the flowers of *pancratium maritimum* L. *Plants* (Basel). 2022;11(4):476. <https://doi.org/10.3390/plants11040476> PMID: 35214809
22. Sanaa A, Boulila A, Boussaid M, Fadhel NB. Alginic acid and derivatives, new polymers from the endangered *Pancreaticum maritimum* L. *Industrial Crops and Products*. 2013;44:290–3. <https://doi.org/10.1016/j.indcrop.2012.11.014>
23. Leporini M, Catinella G, Bruno M, Falco T, Tundis R, Loizzo MR. Investigating the antiproliferative and antioxidant properties of *pancratium maritimum* L. (Amaryllidaceae) stems, flowers, bulbs, and fruits extracts. *Evid Based Complement Alternat Med*. 2018;2018:9301247. <https://doi.org/10.1155/2018/9301247> PMID: 30364050
24. Hetta MH, Shafei AA. Comparative cytotoxic and antimicrobial activities of the alkaloid content of Egyptian *Pancreaticum maritimum* L. fruits and flowers. *J Am Sci*. 2013;9(7):104–9.
25. Masi M, Di Lecce R, Mérendol N, Girard M-P, Berthoux L, Desgagné-Penix I, et al. Cytotoxicity and antiviral properties of alkaloids isolated from *Pancreaticum maritimum*. *Toxins* (Basel). 2022;14(4):262. <https://doi.org/10.3390/toxins14040262> PMID: 35448871
26. Çakici I, Ulug HY, Inci S, Tunçtan B, Abacioglu N, Kanzik I, et al. Antinociceptive effect of some amaryllidaceae plants in mice. *J Pharm Pharmacol*. 1997;49(8):828–30. <https://doi.org/10.1111/j.2042-7158.1997.tb06121.x> PMID: 9379365
27. El-Sayed NM, Ismail KA, Ahmed SA-E-G, Hetta MH. In vitro amoebicidal activity of ethanol extracts of *Arachis hypogaea* L., *Curcuma longa* L. and *Pancreaticum maritimum* L. on *Acanthamoeba castellanii* cysts. *Parasitol Res*. 2012;110(5):1985–92. <https://doi.org/10.1007/s00436-011-2727-3> PMID: 22146994
28. Şener B, Orhan I, Satayavivad J. Antimalarial activity screening of some alkaloids and the plant extracts from Amaryllidaceae. *Phytother Res*. 2003;17(10):1220–3. <https://doi.org/10.1002/ptr.1346> PMID: 14669261
29. Bozkurt B, Kaya GI, Somer NU. Chemical composition and enzyme inhibitory activities of Turkish *Pancreaticum maritimum* bulbs. *Natural Product Communications*. 2019;14(10). <https://doi.org/10.1177/1934578x19872905>
30. Abbas MA, Kandil YI, Disi AM, Jaffal SM. Gastroprotective activity of *Loranthus acaciae* flower extract in a rodent model of ethanol-induced ulcer. *Appl Physiol Nutr Metab*. 2019;44(12):1283–8. <https://doi.org/10.1139/apnm-2019-0166> PMID: 31009579
31. Takagi K, Okabe S. The effects of drugs on the production and recovery processes of the stress ulcer. *Jpn J Pharmacol*. 1968;18(1):9–18. <https://doi.org/10.1254/jjp.18.9> PMID: 5302464
32. Bancroft JD, Gamble M. *Theory and practice of histological techniques*: Elsevier health sciences; 2008.
33. Ohkawa H, Ohishi N, Yagi K. Assay for lipid peroxides in animal tissues by thiobarbituric acid reaction. *Anal Biochem*. 1979;95(2):351–8. [https://doi.org/10.1016/0003-2697\(79\)90738-3](https://doi.org/10.1016/0003-2697(79)90738-3) PMID: 36810
34. Tietze F. Enzymic method for quantitative determination of nanogram amounts of total and oxidized glutathione: applications to mammalian blood and other tissues. *Anal Biochem*. 1969;27(3):502–22. [https://doi.org/10.1016/0003-2697\(69\)90064-5](https://doi.org/10.1016/0003-2697(69)90064-5) PMID: 4388022
35. Bradford MM. A rapid and sensitive method for the quantitation of microgram quantities of protein utilizing the principle of protein-dye binding. *Anal Biochem*. 1976;72:248–54. [https://doi.org/10.1016/0003-2697\(76\)90527-3](https://doi.org/10.1016/0003-2697(76)90527-3) PMID: 942051
36. Purushothaman B, Srinivasan RP, Suganthi P, Ranganathan B, Gimbin J, Shanmugam K. A comprehensive review on *Ocimum basilicum*. *Journal of Natural Remedies*. 2018;18(3):71–85. <https://doi.org/10.18311/jnr/2018/21324>
37. Otify AM, Ibrahim RM, Abib B, Laub A, Wessjohann LA, Jiang Y, et al. Unveiling metabolome heterogeneity and new chemicals in 7 tomato varieties via multiplex approach of UHPLC-MS/MS, GC-MS, and UV-Vis in relation to antioxidant effects as analyzed using molecular networking and chemometrics. *Food Chem*. 2023;417:135866. <https://doi.org/10.1016/j.foodchem.2023.135866> PMID: 36913868
38. Mostafa MM, Farag MA. Profiling of primary and phytonutrients in edible mahlab cherry (*Prunus mahaleb* L.) seeds in the context of its different cultivars and roasting as analyzed using molecular networking and chemometric tools. *PeerJ*. 2023;11:e15908. <https://doi.org/10.7717/peerj.15908> PMID: 37663279
39. El-Akad RH, El-Din MGS, Farag MA. How does *lagenaria siceraria* (Bottle Gourd) metabolome compare to *cucumis sativus* (Cucumber) F. *cucurbitaceae*? a multiplex approach of HR-UPLC/MS/MS and GC/MS using molecular networking and chemometrics. *Foods*. 2023;12(4):771. <https://doi.org/10.3390/foods12040771> PMID: 36832849

40. Zhang Y, Zheng P, Yan G, Zhuo Y, Wu J-L, Sun B. Chemical profiling and antioxidants screening from natural products: using CiNingJi as an example. *Food Sci Biotechnol*. 2022;31(4):407–21. <https://doi.org/10.1007/s10068-022-01049-4> PMID: 35464243
41. Abdl Aziz FT, Temraz AS, Hassan MA. Metabolites profiling by LC-ESI-MS/MS technique and in-vitro antioxidant activity of *Bauhinia madagascariensis* Desv. and *Bauhinia purpurea* L. aerial parts cultivated in Egypt: a comparative study. *Azhar International Journal of Pharmaceutical and Medical Sciences*. 2024;4(1):169–88. <https://doi.org/10.21608/aijpm.2023.212409.1215>
42. Yang L, Zhang Z, Hu X, You L, Khan RAA, Yu Y. Phenolic contents, organic acids, and the antioxidant and bio activity of wild medicinal berberis plants- as Sustainable Sources of Functional Food. *Molecules*. 2022;27(8):2497. <https://doi.org/10.3390/molecules27082497> PMID: 35458693
43. Vargas LHG, Neto JCR, de Aquino Ribeiro JA, Ricci-Silva ME, Souza MT Jr, Rodrigues CM, et al. Metabolomics analysis of oil palm (*Elaeis guineensis*) leaf: evaluation of sample preparation steps using UHPLC–MS/MS. *Metabolomics*. 2016;12(10). <https://doi.org/10.1007/s11306-016-1100-z>
44. Farag MA, El-Kersh DM, Ehrlich A, Choucry MA, El-Seedi H, Frolov A, et al. Variation in *Ceratonia siliqua* pod metabolome in context of its different geographical origin, ripening stage and roasting process. *Food Chem*. 2019;283:675–87. <https://doi.org/10.1016/j.foodchem.2018.12.118> PMID: 30722926
45. Sinosaki N, Tonin AP, Ribeiro MA, Polisel CB, Roberto SB, Silveira Rd, et al. Structural study of phenolic acids by triple quadrupole mass spectrometry with electrospray ionization in negative mode and H/D isotopic exchange. *Journal of the Brazilian Chemical Society*. 2020;31:402–8.
46. Cabañas-García E, Areche C, Jáuregui-Rincón J, Cruz-Sosa F, Pérez-Molphe Balch E. Phytochemical profiling of *Coryphantha macromeris* (Cactaceae) growing in greenhouse conditions using ultra-high-performance liquid chromatography–tandem mass spectrometry. *Molecules*. 2019;24(4):705. <https://doi.org/10.3390/molecules24040705> PMID: 30781375
47. Shi B, Yang L, Gao T, Ma C, Li Q, Nan Y, et al. Pharmacokinetic profile and metabolite identification of bornyl caffeate and caffeic acid in rats by high performance liquid chromatography coupled with mass spectrometry. *RSC Adv*. 2019;9(7):4015–27. <https://doi.org/10.1039/c8ra07972b> PMID: 35518073
48. Manyelo TG, Sebola NA, Hassan ZM, Mabelebele M. Characterization of the phenolic compounds in different plant parts of *amaranthuscruentus* grown under cultivated conditions. *Molecules*. 2020;25(18):4273. <https://doi.org/10.3390/molecules25184273> PMID: 32961894
49. Cornejo-Campos J, Gómez-Aguirre YA, Velázquez-Martínez JR, Ramos-Herrera OJ, Chávez-Murillo CE, Cruz-Sosa F, et al. Impact of the cooking process on metabolite profiling of *acanthocereus tetragonus*, a plant traditionally consumed in Mexico. *Molecules*. 2022;27(12):3707. <https://doi.org/10.3390/molecules27123707> PMID: 35744833
50. Li Z, Zhao C, Zhao X, Xia Y, Sun X, Xie W, et al. Deep annotation of hydroxycinnamic acid amides in plants based on ultra-high-performance liquid chromatography-high-resolution mass spectrometry and its in silico database. *Anal Chem*. 2018;90(24):14321–30. <https://doi.org/10.1021/acs.anal-chem.8b03654> PMID: 30453737
51. Tallini LR, Andrade JP de, Kaiser M, Viladomat F, Nair JJ, Zuanazzi JAS, et al. Alkaloid constituents of the Amaryllidaceae plant *Amaryllis belladonna* L. *Molecules*. 2017;22(9):1437. <https://doi.org/10.3390/molecules22091437> PMID: 28858260
52. Khalifa MF, Attia EZ, Fahim JR, Kamel MS. An overview on the chemical and biological aspects of lycorine alkaloid. *Journal of Advanced Biomedical and Pharmaceutical Sciences*. 2018;1(2):41–9. <https://doi.org/10.21608/jabps.2018.4088.1016>
53. Torras-Claveria L, Berkov S, Viladomat F, Bastida J. QToF exact mass and ESI fragmentation of bioactive Amaryllidaceae alkaloids. *South African Journal of Botany*. 2021;136:81–90. <https://doi.org/10.1016/j.sajb.2020.03.024>
54. Razakov R, Bochkarev VN, Vul'fson NS, Abduazimov KhA, Yunusov SYu. Mass-spectrometric study of alkaloids of the lycorine type. *Chem Nat Compd*. 1968;4(1):15–7. <https://doi.org/10.1007/bf00567754>
55. Qing Z, Xu Y, Yu L, Liu J, Huang X, Tang Z, et al. Investigation of fragmentation behaviours of isoquinoline alkaloids by mass spectrometry combined with computational chemistry. *Sci Rep*. 2020;10(1):733. <https://doi.org/10.1038/s41598-019-57406-7> PMID: 31959815
56. Youssef DTA, Shaala LA, Altyar AE. Cytotoxic Phenylpropanoid Derivatives and Alkaloids from the Flowers of *Pancreaticum maritimum* L. *Plants (Basel, Switzerland)*. 2022;11(4). <https://doi.org/10.3390/plants11040476> PMID: 35214809; PMCID: PMC8875508
57. Wlodarska M, Luo C, Kolde R, d'Hennezel E, Annand JW, Heim CE, et al. Indoleacrylic Acid Produced by Commensal *Peptostreptococcus* Species Suppresses Inflammation. *Cell Host Microbe*. 2017;22(1):25–37.e6. Epub 2017/07/14. <https://doi.org/10.1016/j.chom.2017.06.007> PMID: 28704649; PMCID: PMC5672633

58. Li J, Lu Q, Peng M, Liao J, Zhang B, Yang D, et al. Water extract from *Herpetospermum pedunculatum* attenuates oxidative stress and ferroptosis induced by acetaminophen via regulating Nrf2 and NF- $\kappa$ B pathways. *J Ethnopharmacol*. 2023;305:116069. <https://doi.org/10.1016/j.jep.2022.116069> PMID: [36572326](https://pubmed.ncbi.nlm.nih.gov/36572326/)
59. Mandal SC, Chakraborty R, Sen S. Evidence based validation of traditional medicines: Springer; 2021.
60. Otiy A, George C, Elsayed A, Farag MA. Mechanistic evidence of *Passiflora edulis* (Passifloraceae) anxiolytic activity in relation to its metabolite fingerprint as revealed via LC-MS and chemometrics. *Food Funct*. 2015;6(12):3807–17. <https://doi.org/10.1039/c5fo00875a> PMID: [26437270](https://pubmed.ncbi.nlm.nih.gov/26437270/)
61. He Y, Li Z, Wang W, Sooranna SR, Shi Y, Chen Y, et al. Chemical profiles and simultaneous quantification of *Aurantii fructus* by use of HPLC-Q-TOF-MS combined with GC-MS and HPLC methods. *Molecules*. 2018;23(9):2189. <https://doi.org/10.3390/molecules23092189> PMID: [30200226](https://pubmed.ncbi.nlm.nih.gov/30200226/)
62. Yin J, Ma Y, Liang C, Wang H, Sun Y, Zhang L, et al. A complete study of farrerol metabolites produced in vivo and in vitro. *Molecules*. 2019;24(19):3470. <https://doi.org/10.3390/molecules24193470> PMID: [31554336](https://pubmed.ncbi.nlm.nih.gov/31554336/)
63. Ayanniyi R, Olumoh-Abdul H, Ojuade F, Akintola J. Evaluation of anti-inflammatory and gastroprotective activity of aqueous peel extract of *allium cepa*. 2022.
64. Farag MA, Baky MH, Morgan I, Khalifa MR, Rennert R, Mohamed OG, et al. Comparison of *Balanites aegyptiaca* parts: metabolome providing insights into plant health benefits and valorization purposes as analyzed using multiplex GC-MS, LC-MS, NMR-based metabolomics, and molecular networking. *RSC Adv*. 2023;13(31):21471–93. <https://doi.org/10.1039/d3ra03141a> PMID: [37485437](https://pubmed.ncbi.nlm.nih.gov/37485437/)
65. Khattab OM, El-Kersh DM, Khalifa SAM, Yosri N, El-Seedi HR, Farag MA. Comparative MS- and NMR-Based metabolome mapping of egyptian red and white squill bulbs *F. Liliaceae* and in relation to their cytotoxic effect. *Plants (Basel)*. 2023;12(11):2078. <https://doi.org/10.3390/plants12112078> PMID: [37299060](https://pubmed.ncbi.nlm.nih.gov/37299060/)
66. Panighel G, Ferrarese I, Lupo MG, Sut S, Dall'Acqua S, Ferri N. Investigating the in vitro mode of action of okra (*Abelmoschus esculentus*) as hypocholesterolemic, anti-inflammatory, and antioxidant food. *Food Chem (Oxf)*. 2022;5:100126. <https://doi.org/10.1016/j.fochms.2022.100126> PMID: [35937040](https://pubmed.ncbi.nlm.nih.gov/35937040/)
67. Ul-Haq F, Ali A, Akhtar N, Aziz N, Khan MN, Ahmad M, et al. A high-throughput method for dereplication and assessment of metabolite distribution in *Salvia* species using LC-MS/MS. *J Adv Res*. 2020;24:79–90. <https://doi.org/10.1016/j.jare.2020.02.001> PMID: [32211205](https://pubmed.ncbi.nlm.nih.gov/32211205/)
68. Jia C, Zhu Y, Zhang J, Yang J, Xu C, Mao D. Identification of glycoside compounds from tobacco by high performance liquid chromatography/electrospray ionization linear ion-trap tandem mass spectrometry coupled with electrospray ionization orbitrap mass spectrometry. *Journal of the Brazilian Chemical Society*. 2017;28:629–40.
69. Zhuang X-C, Zhang Y-L, Chen G-L, Liu Y, Hu X-L, Li N. Identification of anti-inflammatory and anti-proliferative neolignan amides from *Warburgia ugandensis* employing multi-target affinity ultrafiltration and LC-MS. *Pharmaceuticals*. 2021;14(4):313.
70. Ghosal S, Mittal P, Kumar Y, Singh SK. Free and glucosyloxy acetophenones from *Pancratium biflorum*. *Phytochemistry*. 1989;28(11):3193–6. [https://doi.org/10.1016/0031-9422\(89\)80305-x](https://doi.org/10.1016/0031-9422(89)80305-x)
71. Morgan AD, Seely KD, Hagenstein LD, Florey GM, Small JM. Bacterial Involvement in Progression and Metastasis of Adenocarcinoma of the Stomach. *Cancers (Basel)*. 2022;14(19):4886. <https://doi.org/10.3390/cancers14194886> PMID: [36230809](https://pubmed.ncbi.nlm.nih.gov/36230809/)
72. Awuchi CG, Igwe VS, Amagwula IO. Nutritional diseases and nutrient toxicities: A systematic review of the diets and nutrition for prevention and treatment. *International Journal of Advanced Academic Research*. 2020;6(1):1–46.
73. Xin Y, Wang H, Xu L. Transcriptomic analysis of Fuzi Lizhong decoction for the treatment of stomach ulcers. *Evid Based Complement Alternat Med*. 2020;2020:3291853. <https://doi.org/10.1155/2020/3291853> PMID: [32148538](https://pubmed.ncbi.nlm.nih.gov/32148538/)
74. Shams SGE, Eissa RG. Amelioration of ethanol-induced gastric ulcer in rats by quercetin: implication of Nrf2/HO1 and HMGB1/TLR4/NF- $\kappa$ B pathways. *Heliyon*. 2022;8(10):e11159. <https://doi.org/10.1016/j.heliyon.2022.e11159> PMID: [36311358](https://pubmed.ncbi.nlm.nih.gov/36311358/)
75. Yatim R, Rais B, Shah N. A study on the evaluation of the anti-ulcerogenic activity of hyaluronic acid against ethanol induced gastric mucosal injury in rats. *International Journal of Medicine and Medical Sciences*. 2020;10(4):001–8.
76. Xue Q, Liu X, Zhu R, Zhang T, Dong X, Jiang Y. Comprehensive analysis of transcriptomics and metabolomics to understand chronic ethanol induced murine cardiotoxicity. *Mol Cell Biochem*. 2022:1–15.

77. Wu H, Li W, Hao M, Wang Y, Xue L, Ju C, et al. An EPR-Independent extravasation Strategy: Deformable leukocytes as vehicles for improved solid tumor therapy. *Adv Drug Deliv Rev.* 2022;187:114380. <https://doi.org/10.1016/j.addr.2022.114380> PMID: [35662610](#)
78. Hobani YH, Mohan S, Shaheen E, Abdelhaleem A, Faruque Ahmad M, Bhatia S, et al. Gastroprotective effect of low dose Eugenol in experimental rats against ethanol induced toxicity: Involvement of antiinflammatory and antioxidant mechanism. *J Ethnopharmacol.* 2022;289:115055. <https://doi.org/10.1016/j.jep.2022.115055> PMID: [35101571](#)
79. Corcoran SE, Halai R, Cooper MA. Pharmacological inhibition of the nod-like receptor family pyrin domain containing 3 inflammasome with MCC950. *Pharmacol Rev.* 2021;73(3):968–1000. <https://doi.org/10.1124/pharmrev.120.000171> PMID: [34117094](#)
80. Wei X, Xie F, Zhou X, Wu Y, Yan H, Liu T, et al. Role of pyroptosis in inflammation and cancer. *Cell Mol Immunol.* 2022;19(9):971–92. <https://doi.org/10.1038/s41423-022-00905-x> PMID: [35970871](#)
81. Chen R, Kang R, Tang D. The mechanism of HMGB1 secretion and release. *Exp Mol Med.* 2022;54(2):91–102.
82. Chibaatar E, Le K, Abdoulaye I, Wu S, Guo Y. Melatonin ameliorates lipopolysaccharide-induced microglial inflammation via triggering SIRT1/HMGB1 signaling axis. *J Mol Neurosci.* 2021;71:691–701.
83. Fu S, Chen J, Zhang C, Shi J, Nie X, Hu Y, et al. Gastroprotective effects of *Periplaneta americana* L. extract against ethanol-induced gastric ulcer in mice by suppressing apoptosis-related pathways. *Front Pharmacol.* 2021;12:798421. <https://doi.org/10.3389/fphar.2021.798421> PMID: [34975497](#)
84. Maziero Alves G, Aires R, de Souza Santos V, Zambom C  o L, Peters B, de Leone Evangelista Monteiro Assis A, et al. Sildenafil attenuates nonsteroidal anti-inflammatory-induced gastric ulceration in mice via antioxidant and antigenotoxic mechanisms. *Clin Exp Pharmacol Physiol.* 2021;48(3):401–11. <https://doi.org/10.1111/1440-1681.13414> PMID: [33020944](#)
85. Manivannan S, Wales E, Zaben M. The role of HMGB1 in traumatic brain injury—bridging the gap between the laboratory and clinical studies. *Curr Neurol Neurosci Rep.* 2021;21:1–7.
86. Meng T, Xiao D, Muhammed A, Deng J, Chen L, He J. Anti-inflammatory action and mechanisms of resveratrol. *Molecules.* 2021;26(1):229. <https://doi.org/10.3390/molecules26010229> PMID: [33466247](#)
87. de Sousa Falc  o H, Leite JA, Barbosa-Filho JM, de Athayde-Filho PF, de Oliveira Chaves MC, Moura MD, et al. Gastric and duodenal antiulcer activity of alkaloids: a review. *Molecules.* 2008;13(12):3198–223. <https://doi.org/10.3390/molecules13123198> PMID: [19104486](#)
88. do Nascimento RF, de Sales IRP, de Oliveira Formiga R, Barbosa-Filho JM, Sobral MV, Tavares JF, et al. Activity of alkaloids on peptic ulcer: what's new?. *Molecules.* 2015;20(1):929–50. <https://doi.org/10.3390/molecules20010929> PMID: [25580688](#)
89. Zhang S-L, Li H, He X, Zhang R-Q, Sun Y-H, Zhang C-F, et al. Alkaloids from *Mahonia bealei* possess anti-H<sup>+</sup>/K<sup>+</sup>-ATPase and anti-gastrin effects on pyloric ligation-induced gastric ulcer in rats. *Phytomedicine.* 2014;21(11):1356–63. <https://doi.org/10.1016/j.phymed.2014.07.007> PMID: [25172799](#)
90. Wu J, Luo Y, Deng D, Su S, Li S, Xiang L, et al. Coptisine from *Coptis chinensis* exerts diverse beneficial properties: a concise review. *J Cell Mol Med.* 2019;23(12):7946–60. <https://doi.org/10.1111/jcmm.14725> PMID: [31622015](#)
91. Zhang W, Lian Y, Li Q, Sun L, Chen R, Lai X, et al. Preventative and therapeutic potential of flavonoids in peptic ulcers. *Molecules.* 2020;25(20):4626. <https://doi.org/10.3390/molecules25204626> PMID: [33050668](#)
92. Serafim C, Araruna M, J  nior E, Diniz M, Hiruma-Lima C, Batista L. A review of the role of flavonoids in peptic ulcer (2010–2020). *Molecules.* 2020;25(22):5431.
93. Yesilada E, G  rb  z I, Tok  r G. Anti-ulcerogenic activity and isolation of the active principles from *Sambucus ebulus* L. leaves. *J Ethnopharmacol.* 2014;153(2):478–83. <https://doi.org/10.1016/j.jep.2014.03.004> PMID: [24632015](#)
